# Supplementary material for: Chemistry and bioactivity of lindenane sesquiterpenoids and their oligomers
Source: Royal Society of Chemistry journal article supplement (doi:10.1039/d3np00022b), 2023-10-04
Supplement: d3np00022b1.pdf [file d3np00022b1.pdf]

## Electronical Supporting Information

### Chemistry and bioactivity of lindenane sesquiterpenoids and their oligomers

Jun Luo, Danyang Zhang, Pengfei Tang, Nan Wang, Shuai Zhao, Lingyi Kong\*

*Jiangsu Key Laboratory of Bioactive Natural Product Research and State Key Laboratory of Natural Medicines, School of Traditional Chinese Pharmacy, China Pharmaceutical University, Nanjing 210009, People's Republic of China*

\*Corresponding author: [cpu\\_lykong@126.com](mailto:cpu_lykong@126.com) (Lingyi Kong)

## Contents

|                                                                                                                                          |     |
|------------------------------------------------------------------------------------------------------------------------------------------|-----|
| <b>Table S1-1</b> Structure names, sources and bioactivity of ring- <i>intact</i> type LS monomers (1-27).....                           | S5  |
| <b>Table S1-2</b> Structure names, sources and bioactivity of ring- <i>intact</i> type LS monomers (28-55).....                          | S6  |
| <b>Table S1-3</b> Structure names, sources and bioactivity of ring- <i>intact</i> type LS monomers (56-81).....                          | S7  |
| <b>Table S1-4</b> Structure names, sources and bioactivity of ring- <i>intact</i> type LS monomers (82-95).....                          | S8  |
| <b>Table S2</b> Structure names, sources and bioactivity of ring- <i>seco</i> type LS monomers (96-110).....                             | S9  |
| <b>Table S3-1</b> Structure names, sources and bioactivity of <i>homo</i> -[4 + 2] cycloaddition type LS dimers (111-136).....           | S12 |
| <b>Table S3-2</b> Structure names, sources and bioactivity of <i>homo</i> -[4 + 2] cycloaddition type LS dimers (137-163).....           | S13 |
| <b>Table S3-3</b> Structure names, sources and bioactivity of <i>homo</i> -[4 + 2] cycloaddition type LS dimers (164-188).....           | S15 |
| <b>Table S3-4</b> Structure names, sources and bioactivity of <i>homo</i> -[4 + 2] cycloaddition type LS dimers (189-215).....           | S17 |
| <b>Table S3-5</b> Structure names, sources and bioactivity of <i>homo</i> -[4 + 2] cycloaddition type LS dimers (216-240).....           | S19 |
| <b>Table S3-6</b> Structure names, sources and bioactivity of <i>homo</i> -[4 + 2] cycloaddition type LS dimers (241-254).....           | S21 |
| <b>Table S4</b> Structure names, sources and bioactivity of <i>homo</i> -[2 + 2] and [6 + 6] cycloaddition type LS dimers (255-271)..... | S23 |
| <b>Table S5-1</b> Structure names, sources and bioactivity of <i>homo</i> -linear linkage type LS dimers (272-298).....                  | S25 |
| <b>Table S5-2</b> Structure names, sources and bioactivity of <i>homo</i> -linear linkage type LS dimers (299-304).....                  | S26 |
| <b>Table S6</b> Structure names, sources and bioactivity of <i>hetero</i> -[4 + 2] cycloaddition type LS dimers (305-311).....           | S26 |
| <b>Table S7</b> Structure names, sources and bioactivity of <i>hetero</i> -[2 + 2 + 2] cycloaddition type LS dimers (312-323).....       | S27 |
| <b>Table S8</b> Structure names, sources and bioactivity of <i>hetero</i> -linear linkage type LS dimers (324-335).....                  | S28 |
| <b>Table S9</b> Structure names, sources and bioactivity of <i>homo</i> -[4 + 2] cycloaddition type LS trimers (336-345).....            | S29 |
| <b>Table S10</b> Structure names, sources and bioactivity of <i>homo</i> -linear linkage type LS trimers (346-348).....                  | S30 |
| <b>Table S11</b> Structure names, sources and bioactivity of <i>hetero</i> -LS trimers (349-354).....                                    | S30 |
| <b>Reference</b> .....                                                                                                                   | S31 |

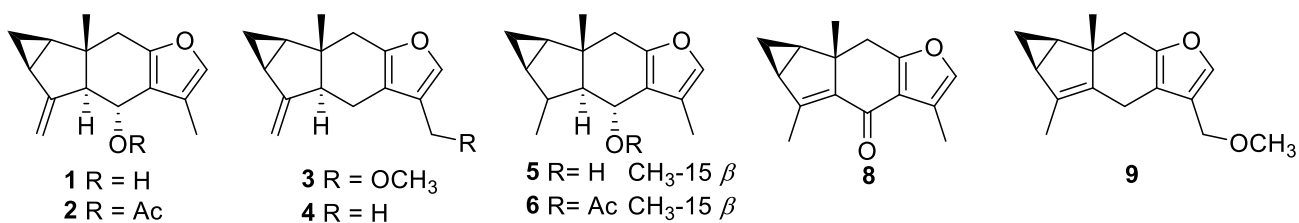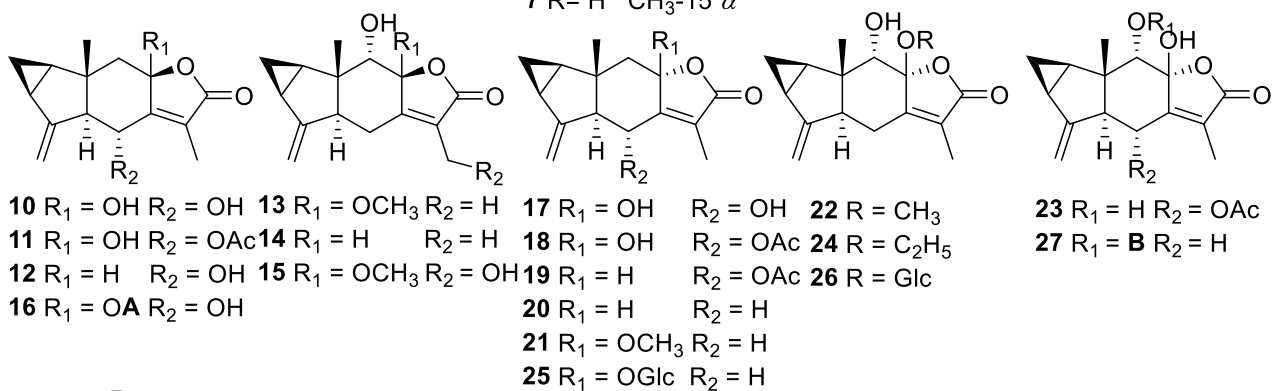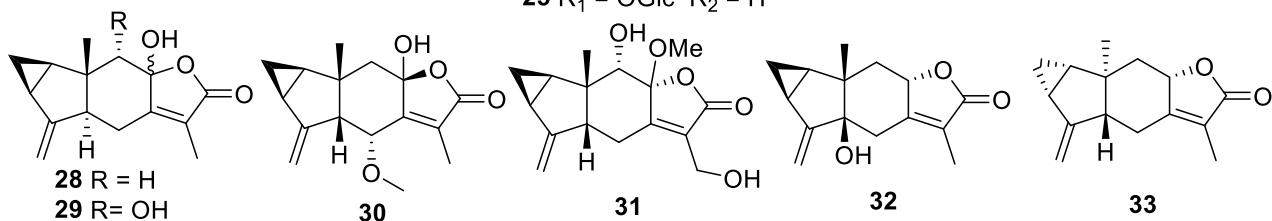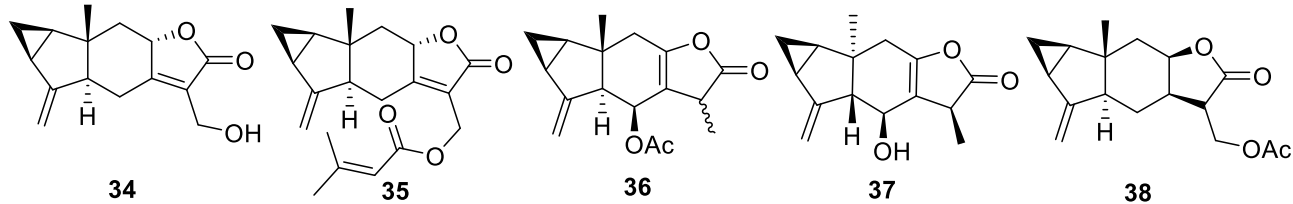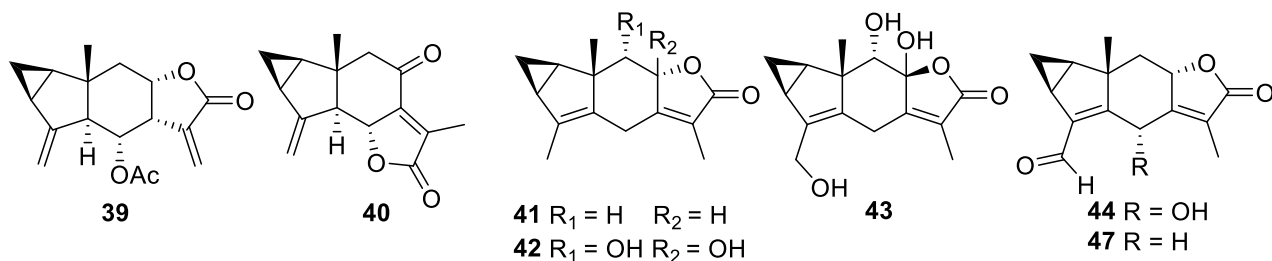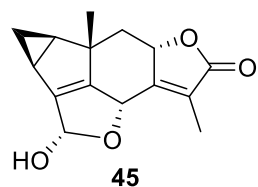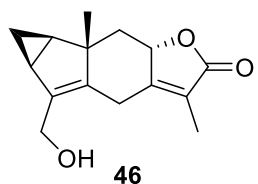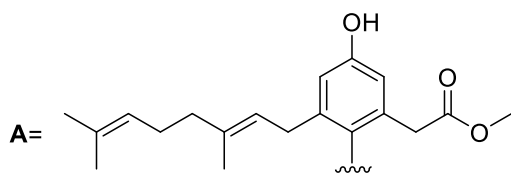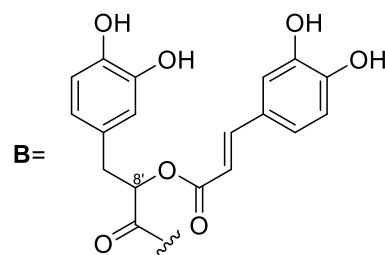

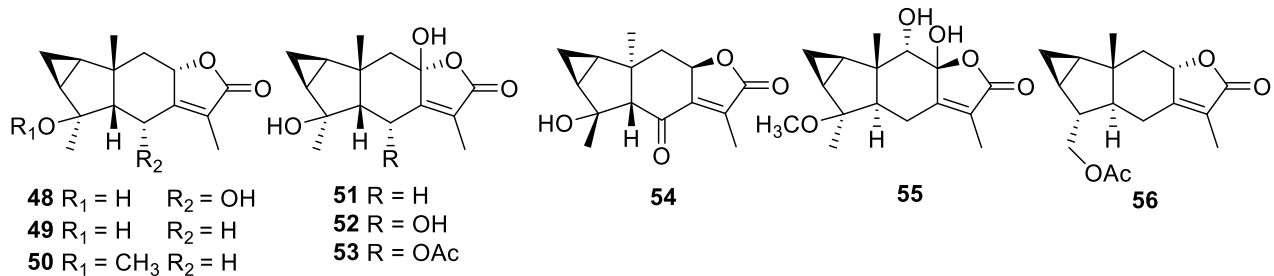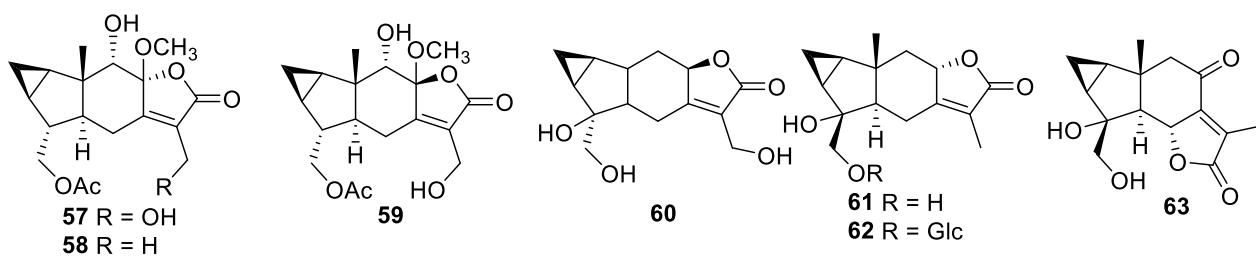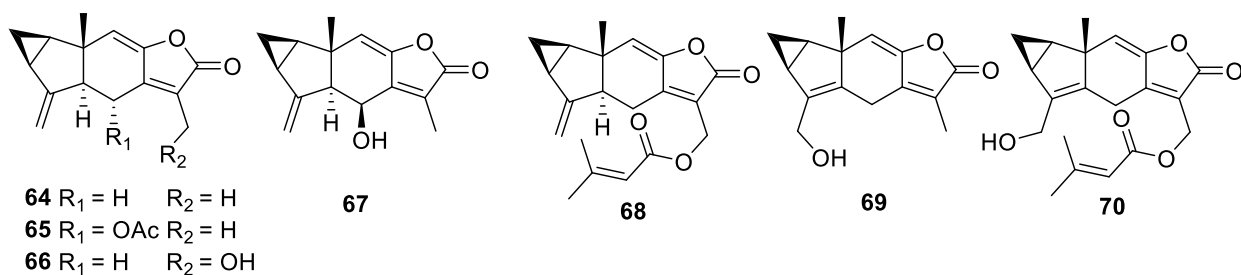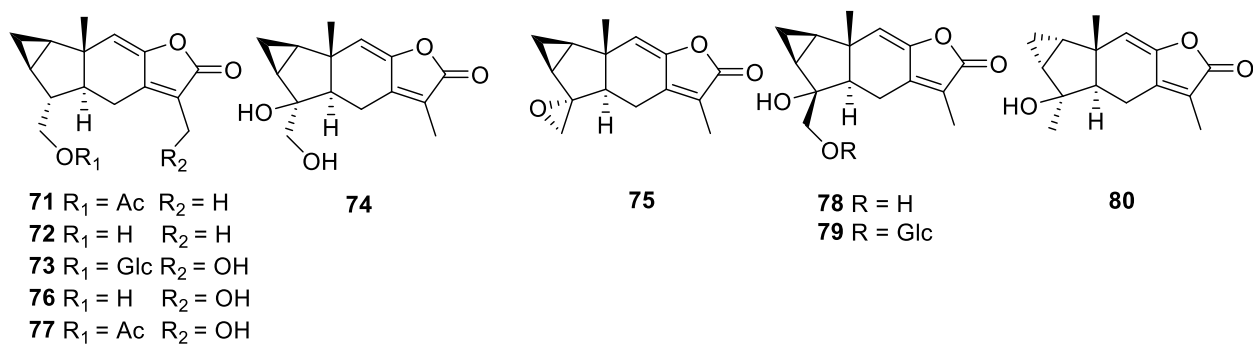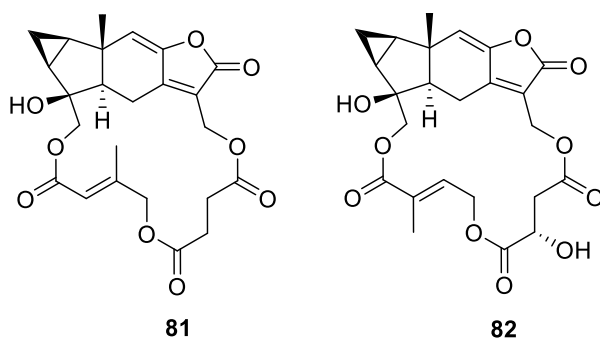

**Table S1-1** Structure names, sources and bioactivity of ring-intact type LS monomers (1-27).

| No | Compound                                                                      | Sources                                                                                                             | Bioactivity                       |
|----|-------------------------------------------------------------------------------|---------------------------------------------------------------------------------------------------------------------|-----------------------------------|
| 1  | Lindenenol                                                                    | <i>Lindera strychnifolia</i> , <sup>1-4</sup><br><i>L. chunii</i> , <sup>5</sup> <i>L. aggregata</i> <sup>6,7</sup> |                                   |
| 2  | Lindenyl acetate                                                              | <i>L. strychnifolia</i> , <sup>2</sup> <i>L. chunii</i> , <sup>5</sup><br><i>L. aggregata</i> <sup>6</sup>          |                                   |
| 3  | Linderoxide                                                                   | <i>L. strychnifolia</i> <sup>8</sup>                                                                                |                                   |
| 4  | Lindenene                                                                     | <i>L. strychnifolia</i> <sup>4,9</sup>                                                                              |                                   |
| 5  | Linderene                                                                     | <i>L. strychnifolia</i> <sup>10</sup>                                                                               |                                   |
| 6  | Linderene acetate                                                             | <i>L. strychnifolia</i> <sup>10</sup>                                                                               |                                   |
| 7  | Isodihydrolinderene                                                           | <i>L. strychnifolia</i> <sup>10</sup>                                                                               |                                   |
| 8  | Lindenone                                                                     | <i>L. strychnifolia</i> <sup>10</sup>                                                                               |                                   |
| 9  | Isolinderoxide                                                                | <i>L. strychnifolia</i> <sup>11</sup>                                                                               |                                   |
| 10 | Strychnistenolide A                                                           | <i>L. strychnifolia</i> <sup>12</sup>                                                                               |                                   |
| 11 | 6 $\alpha$ -acetyl-lindenanolide A<br>(Strychnistenolide 6-O-<br>acetate B1)  | <i>L. aggregata</i> , <sup>13</sup> <i>L. chunii</i> , <sup>5</sup><br><i>L. strychnifolia</i> <sup>12</sup>        |                                   |
| 12 | Strychnilactone 2,6-<br>dihydroxyxanthone                                     | <i>L. strychnifolia</i> <sup>3,13</sup>                                                                             |                                   |
| 13 | Chlorajapolide F                                                              | <i>Chloranthus japonicus</i> <sup>14</sup>                                                                          | Cytotoxicity <sup>14</sup>        |
| 14 | Chlojaponilactone G                                                           | <i>C. japonicus</i> <sup>15</sup>                                                                                   |                                   |
| 15 | Decorone A                                                                    | <i>Gochmatia decora</i> <sup>16</sup>                                                                               |                                   |
| 16 | Linderin A                                                                    | <i>L. aggregata</i> <sup>6</sup>                                                                                    |                                   |
| 17 | Strychnistenolide B                                                           | <i>L. strychnifolia</i> <sup>12</sup>                                                                               |                                   |
| 18 | 6 $\alpha$ -acetyl-lindenanolides B<br>(Strychnistenolide 6-O-<br>acetate B2) | <i>L. aggregata</i> , <sup>12</sup> <i>L. chunii</i> , <sup>5</sup><br><i>L. strychnifolia</i> <sup>13</sup>        |                                   |
| 19 | Lindenanolide H                                                               | <i>L. chunii</i> , <sup>5</sup> <i>L. strychnifolia</i> <sup>4</sup>                                                |                                   |
| 20 | Shizukanolide<br>(Shizukanolide A)                                            | <i>C. japonicus</i> , <sup>14,17,18</sup><br><i>L. strychnifolia</i> <sup>4</sup>                                   | Cytotoxicity <sup>14</sup>        |
| 21 | Heterogorgiolide                                                              | <i>Heterogorgia uatumani</i> <sup>19</sup>                                                                          |                                   |
| 22 | 9-hydroxy heterogorgiolide<br>(Chlorajapolide Fa)                             | <i>C. japonicus</i> , <sup>14,20</sup> <i>S. glabra</i> <sup>21</sup>                                               | Collagen inhibitory <sup>20</sup> |
| 23 | Chlojaponilactone F                                                           | <i>C. japonicus</i> <sup>15</sup>                                                                                   |                                   |
| 24 | Chlojaponilactone H                                                           | <i>C. japonicus</i> <sup>15</sup>                                                                                   | Antifungal <sup>15</sup>          |
| 25 | Chlorajaposide                                                                | <i>C. japonicus</i> <sup>22</sup>                                                                                   |                                   |
| 26 | Chloranthalactone E 8-O- $\beta$ -<br>D-glucopyranoside                       | <i>Sarcandra glabra</i> <sup>23</sup>                                                                               | Hepatoprotective <sup>23</sup>    |
| 27 | Rosmarylchloranthalactone<br>E                                                | <i>C. japonicus</i> <sup>24</sup>                                                                                   | PDE4 inhibitory <sup>24</sup>     |

**Table S1-2** Structure names, sources and bioactivity of ring-intact type LS monomers (27-55).

| No | Compound                                                                    | Sources                                                                                                           | Bioactivity                         |
|----|-----------------------------------------------------------------------------|-------------------------------------------------------------------------------------------------------------------|-------------------------------------|
| 28 | Chloranthalactone D                                                         | <i>C. japonicus</i> , <sup>25</sup> <i>L. strychnifolia</i> <sup>4, 13</sup>                                      |                                     |
| 29 | Chloranthalactone E                                                         | <i>C. japonicus</i> , <sup>14, 15, 25</sup><br><i>C. glaber</i> , <sup>26</sup> <i>S. glabra</i> <sup>27-29</sup> | Cytotoxicity <sup>14</sup>          |
| 30 | Linderolide T                                                               | <i>L. strychnifolia</i> <sup>13</sup>                                                                             |                                     |
| 31 | Decorone B                                                                  | <i>G. decora</i> <sup>16</sup>                                                                                    |                                     |
| 32 | Sarcandralactone A                                                          | <i>S. glabra</i> <sup>28</sup>                                                                                    |                                     |
| 33 | Menelloide C                                                                | <i>Gorgonian Coral Menella sp</i> <sup>30</sup><br><i>L. strychnifolia</i> <sup>13</sup>                          |                                     |
| 34 | Onoseriolide A*                                                             | <i>Leontopodium leontopodioides</i> <sup>31</sup>                                                                 |                                     |
| 35 | 8 $\alpha$ ,9-dihydroonoseriolide senecioute                                | <i>L. leontopodioides</i> <sup>31</sup>                                                                           |                                     |
| 36 | Lindenanolide A                                                             | <i>L. strychnifolia</i> <sup>4, 32</sup>                                                                          |                                     |
| 37 | Linderolide V                                                               | <i>L. strychnifolia</i> <sup>33</sup>                                                                             | ARE-Inducing activity <sup>33</sup> |
| 38 | Onoseriolide acetate                                                        | <i>Hyalis argentea var. latisquama</i> <sup>34</sup>                                                              |                                     |
| 39 | Wunderoild                                                                  | <i>Wunderlichia Mirabilis</i> <sup>35</sup>                                                                       |                                     |
| 40 | Sibirolide A                                                                | <i>Xanthium sibiricum</i> <sup>36</sup>                                                                           |                                     |
| 41 | Isoshizukanolide                                                            | <i>C. fortunei</i> <sup>37</sup>                                                                                  |                                     |
| 42 | 8 $\beta$ ,9 $\alpha$ -dihydroxylindan-4(5),7(11)-dien-8 $\alpha$ ,12-olide | <i>S. glabra</i> <sup>27</sup>                                                                                    |                                     |
| 43 | Glabranol A                                                                 | <i>S. glabra</i> , <sup>38</sup> <i>C. japonicus</i> <sup>39</sup>                                                |                                     |
| 44 | Chlorajapolide A                                                            | <i>C. japonicus</i> <sup>22</sup>                                                                                 |                                     |
| 45 | Chlorajapolide B                                                            | <i>C. japonicus</i> <sup>22</sup>                                                                                 |                                     |
| 46 | Chlorajapolide C                                                            | <i>C. japonicus</i> <sup>22</sup>                                                                                 | Cytotoxicity <sup>22</sup>          |
| 47 | Chlojaponilacton D                                                          | <i>C. japonicus</i> <sup>18</sup>                                                                                 |                                     |
| 48 | Linderolide K                                                               | <i>L. strychnifolia</i> <sup>4</sup>                                                                              |                                     |
| 49 | Linderolide N                                                               | <i>L. strychnifolia</i> <sup>13</sup>                                                                             |                                     |
| 50 | Linderolide O                                                               | <i>L. strychnifolia</i> <sup>13</sup>                                                                             | Anti-Inflammatory <sup>13</sup>     |
| 51 | Linderolide P                                                               | <i>L. strychnifolia</i> <sup>13</sup>                                                                             | Anti-Inflammatory <sup>13</sup>     |
| 52 | Linderolide Q                                                               | <i>L. strychnifolia</i> <sup>13</sup>                                                                             |                                     |
| 53 | Linderolide R                                                               | <i>L. strychnifolia</i> <sup>13</sup>                                                                             |                                     |
| 54 | Linderolide S                                                               | <i>L. strychnifolia</i> <sup>13</sup>                                                                             |                                     |
| 55 | Sarcandralactone C                                                          | <i>S. glabra</i> <sup>29</sup>                                                                                    |                                     |

\*Compound 34 and compound 66 possessing the same name, in order to distinguish them, we named 34 Onoseriolide A.

**Table S1-3** Structure names, sources and bioactivity of ring-intact type LS monomers (**56-81**).

| No | Compound                                 | Sources                                                                                                                                                                                                           | Bioactivity                                                  |
|----|------------------------------------------|-------------------------------------------------------------------------------------------------------------------------------------------------------------------------------------------------------------------|--------------------------------------------------------------|
| 56 | Chlojaponilactone E                      | <i>C. japonicus</i> <sup>14, 18</sup>                                                                                                                                                                             | Cytotoxicity <sup>14</sup>                                   |
| 57 | Chlorajapolide E                         | <i>C. japonicus</i> <sup>22</sup>                                                                                                                                                                                 |                                                              |
| 58 | Chlorajapolide H                         | <i>C. japonicus</i> <sup>14</sup>                                                                                                                                                                                 | Cytotoxicity <sup>14</sup>                                   |
| 59 | Chlojaponilactone I                      | <i>C. japonicus</i> <sup>15</sup>                                                                                                                                                                                 |                                                              |
| 60 | Decorone D                               | <i>G. decora</i> <sup>16</sup>                                                                                                                                                                                    |                                                              |
| 61 | Chlorajapolide D                         | <i>C. japonicus</i> , <sup>22</sup> <i>C. sessilifolius</i> <sup>40</sup>                                                                                                                                         |                                                              |
| 62 | Yinxiancaoside A                         | <i>C. japonicus</i> , <sup>41</sup> <i>S. glabra</i> <sup>21</sup>                                                                                                                                                | Cytotoxicity <sup>41</sup>                                   |
| 63 | Myrrhalindenane B                        | <i>L. myrrha</i> <sup>42</sup>                                                                                                                                                                                    |                                                              |
| 64 | Chloranthalactone A<br>(Shizukanolide B) | <i>S. glabra</i> , <sup>43</sup> <i>C. glaber</i> , <sup>26, 44</sup><br><i>C. japonicus</i> , <sup>15, 17, 25</sup><br><i>C. tianmushanensis</i> , <sup>45</sup><br><i>Hedyosmum angustifolium</i> <sup>46</sup> | Cytotoxicity <sup>25</sup>                                   |
| 65 | Chlojaponilactone B                      | <i>C. japonicus</i> <sup>18</sup>                                                                                                                                                                                 |                                                              |
| 66 | Onoseriolid B*                           | <i>H. angustifolium</i> <sup>46</sup>                                                                                                                                                                             |                                                              |
| 67 | Sibirolide B                             | <i>X. sibiricum</i> <sup>36</sup>                                                                                                                                                                                 |                                                              |
| 68 | Onoseriolide senecioate                  | <i>L. leontopodioides</i> , <sup>31</sup><br><i>H. argentea</i> var. <i>latisquama</i> <sup>34</sup>                                                                                                              |                                                              |
| 69 | Sarcandralactone D                       | <i>S. glabra</i> <sup>29</sup>                                                                                                                                                                                    |                                                              |
| 70 | 15-hydroxyisoonoseriolide<br>senecioate  | <i>L. leontopodioides</i>                                                                                                                                                                                         |                                                              |
| 71 | Chloranthalactone C                      | <i>C. japonicus</i> , <sup>18, 25, 47, 48</sup><br><i>C. fortunei</i> , <sup>49</sup> <i>S. glabra</i> <sup>28</sup>                                                                                              |                                                              |
| 72 | Shizukanolide C                          | <i>C. japonicus</i> , <sup>18, 47, 48</sup> <i>C. fortunei</i> , <sup>49</sup>                                                                                                                                    |                                                              |
| 73 | Chloranoside B                           | <i>C. glaber</i> <sup>50</sup>                                                                                                                                                                                    |                                                              |
| 74 | Chlorajaponol F                          | <i>C. japonicus</i> <sup>39</sup>                                                                                                                                                                                 |                                                              |
| 75 | Chloranthalactone G                      | <i>S. glabra</i> <sup>43</sup>                                                                                                                                                                                    |                                                              |
| 76 | Shizukanolide F                          | <i>C. japonicus</i> , <sup>47</sup> <i>C. fortunei</i> <sup>49</sup>                                                                                                                                              |                                                              |
| 77 | Shizukanolide H                          | <i>C. fortunei</i> <sup>49</sup>                                                                                                                                                                                  |                                                              |
| 78 | Shizukanolide E                          | <i>C. japonicus</i> <sup>47</sup>                                                                                                                                                                                 |                                                              |
| 79 | Chloranoside A                           | <i>C. glaber</i> , <sup>50</sup> <i>S. glabra</i> , <sup>21, 23</sup><br><i>C. japonicus</i> , <sup>41</sup> <i>C. fortunei</i> <sup>49</sup>                                                                     | Hepatoprotective <sup>23</sup><br>Cytotoxicity <sup>41</sup> |
| 80 | Linderaggregin B                         | <i>L. aggregata</i> <sup>51</sup>                                                                                                                                                                                 |                                                              |
| 81 | Chlorafortulide                          | <i>C. fortunei</i> <sup>52</sup>                                                                                                                                                                                  |                                                              |
| 82 | Sarglabolide L                           | <i>S. glabra</i> <sup>53</sup>                                                                                                                                                                                    | Anti-Inflammatory <sup>53</sup>                              |

\*Compound 66 and compound 34 possessing the same name, in order to distinguish them, we named 66 Onoseriolide B.

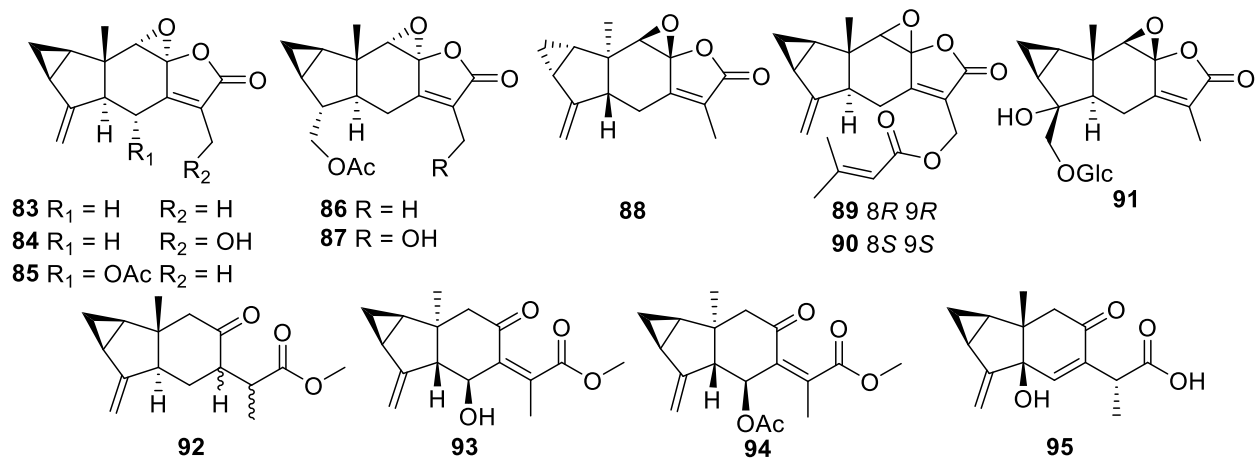

**Table S1-4** Structure names, sources and bioactivity of ring-intact type LS monomers (**82-95**).

| No        | Compound                           | Sources                                                                                                            | Bioactivity                    |
|-----------|------------------------------------|--------------------------------------------------------------------------------------------------------------------|--------------------------------|
| <b>83</b> | Chloranthalactone B                | <i>C. glaber</i> , <sup>26, 44</sup> <i>S. glabra</i> , <sup>21</sup><br><i>C. japonicus</i> <sup>14, 15, 25</sup> | Cytotoxicity <sup>14, 25</sup> |
| <b>84</b> | Oxyonoseriolide                    | <i>H. angustifolium</i> <sup>46</sup>                                                                              | Cytotoxicity <sup>46</sup>     |
| <b>85</b> | Chlojaponilactone C                | <i>C. japonicus</i> <sup>18</sup>                                                                                  |                                |
| <b>86</b> | Shizukanolide D                    | <i>C. japonicus</i> <sup>47</sup>                                                                                  |                                |
| <b>87</b> | Shizukanolide G                    | <i>C. fortunei</i> <sup>49</sup>                                                                                   |                                |
| <b>88</b> | (+)-chloranthalactone B            | <i>Menella sp</i> <sup>54</sup>                                                                                    |                                |
| <b>89</b> | 13-desoxyisoonoseriolide           | <i>H. argentea var. latisquama</i> <sup>34</sup>                                                                   |                                |
| <b>90</b> | 8β,9β-epoxyonoseriolide senecioate | <i>L. leontopodioides</i>                                                                                          |                                |
| <b>91</b> | Sarcaglaboside F                   | <i>S. glabra</i> <sup>21</sup>                                                                                     |                                |
| <b>92</b> | Hedyosmone                         | <i>H. angustifolium</i> <sup>46</sup>                                                                              |                                |
| <b>93</b> | Linderolide U                      | <i>L. aggregata</i> , <sup>7</sup> <i>L. strychnifolia</i> <sup>33</sup>                                           |                                |
| <b>94</b> | Linderolide L                      | <i>L. strychnifolia</i> <sup>4</sup>                                                                               |                                |
| <b>95</b> | Myrrhalindenane A                  | <i>L. myrrha</i> <sup>42</sup>                                                                                     |                                |



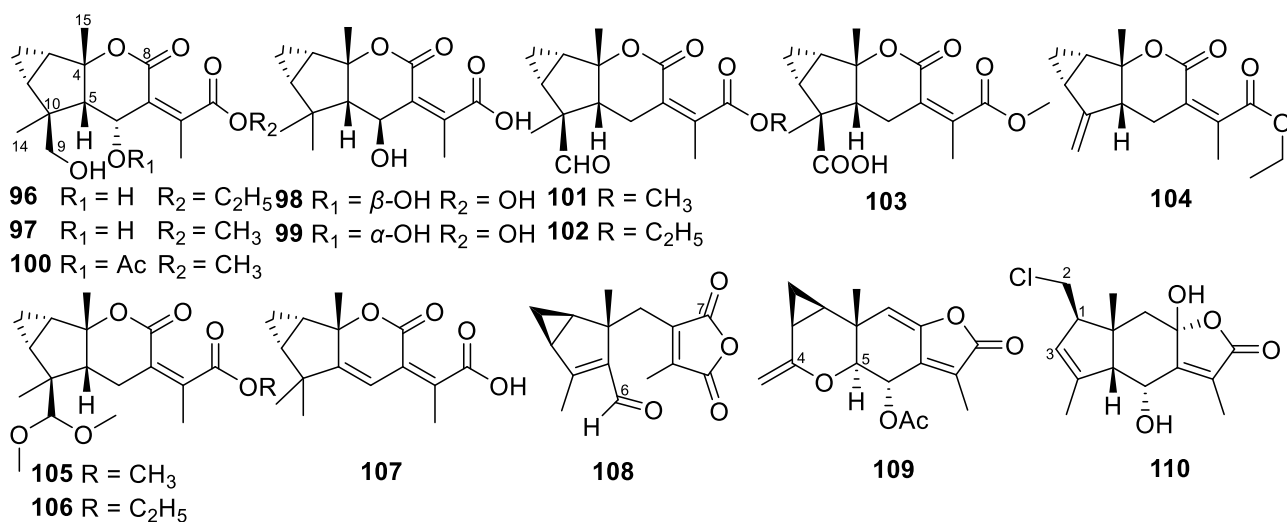

**Table S2** Structure names, sources and bioactivity of ring-*seco* type LS monomers (**96-110**).

| No         | Compound                | Sources                                                               | Bioactivity                |
|------------|-------------------------|-----------------------------------------------------------------------|----------------------------|
| <b>96</b>  | Strychnilactone         | <i>L. strychnifolia</i> <sup>12</sup>                                 |                            |
| <b>97</b>  | Lindenanolide G         | <i>L. chunii</i> , <sup>5</sup> <i>L. strychnifolia</i> <sup>13</sup> |                            |
| <b>98</b>  | Linderagalactone B      | <i>L. aggregata</i> <sup>55</sup>                                     |                            |
| <b>99</b>  | Linderolide M           | <i>L. strychnifolia</i> <sup>4</sup>                                  |                            |
| <b>100</b> | Rotundusolide A         | <i>Cyperus rotundus</i> <sup>56</sup>                                 |                            |
| <b>101</b> | Chloranerectuslactone V | <i>C. erecyus</i> <sup>57</sup>                                       |                            |
| <b>102</b> | Sarglactone I           | <i>S. glabra</i> <sup>58</sup>                                        | Cytotoxicity <sup>58</sup> |
| <b>103</b> | Sarglactone J           | <i>S. glabra</i> <sup>58</sup>                                        |                            |
| <b>104</b> | Sarglactone K           | <i>S. glabra</i> <sup>58</sup>                                        |                            |
| <b>105</b> | Sarglactone L           | <i>S. glabra</i> <sup>58</sup>                                        |                            |
| <b>106</b> | Sarglactone M           | <i>S. glabra</i> <sup>58</sup>                                        |                            |
| <b>107</b> | Linderagalactone C      | <i>L. aggregata</i> <sup>55</sup>                                     |                            |
| <b>108</b> | Lindenanolide E         | <i>L. chunii</i> <sup>5</sup>                                         |                            |
| <b>109</b> | Linderaggregedin C      | <i>L. aggregata</i> <sup>51</sup>                                     |                            |
| <b>110</b> | Linderagalactone A      | <i>L. aggregata</i> <sup>55</sup>                                     |                            |

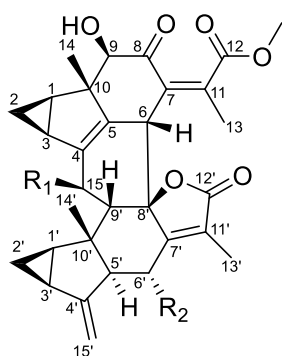

111  $R_1 = H$   $R_2 = H$   
 113  $R_1 = H$   $R_2 = OAc$   
 114  $R_1 = OH$   $R_2 = H$

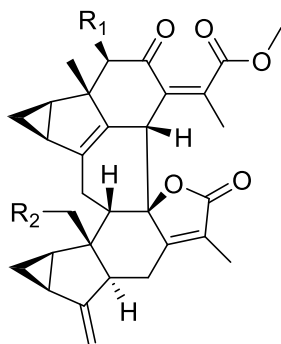

112  $R_1 = OAc$   $R_2 = H$   
 115  $R_1 = H$   $R_2 = H$   
 117  $R_1 = H$   $R_2 = OAc$

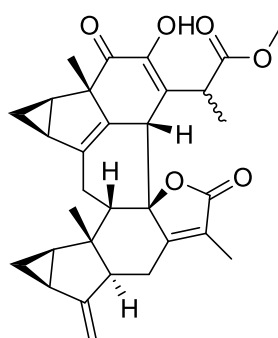

116

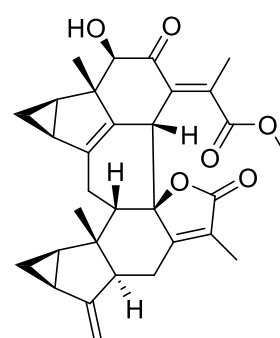

118

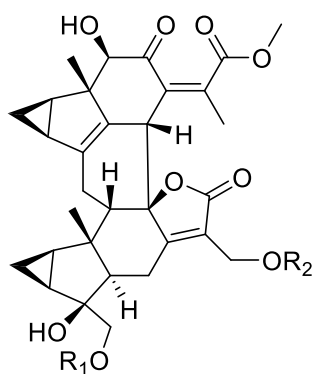

119  $R_1 = Ac$   $R_2 = H$  133  $R_1 = H$   $R_2 = H$   
 121  $R_1 = C$   $R_2 = H$  134  $R_1 = F$   $R_2 = H$   
 122  $R_1 = D$   $R_2 = Ac$  135  $R_1 = F$   $R_2 = J$   
 123  $R_1 = E$   $R_2 = Ac$  136  $R_1 = O$   $R_2 = H$   
 124  $R_1 = Ac$   $R_2 = H$  137  $R_1 = D$   $R_2 = L$   
 126  $R_1 = D$   $R_2 = H$  138  $R_1 = M$   $R_2 = G$   
 128  $R_1 = F$   $R_2 = H$  139  $R_1 = N$   $R_2 = H$   
 129  $R_1 = D$   $R_2 = G$  140  $R_1 = E$   $R_2 = H$   
 130  $R_1 = C$   $R_2 = L$  141  $R_1 = C$   $R_2 = H$   
 131  $R_1 = C$   $R_2 = G$  142  $R_1 = C$   $R_2 = L$   
 132  $R_1 = I$   $R_2 = H$  145  $R_1 = Ac$   $R_2 = Ac$

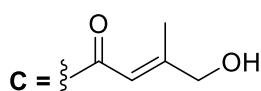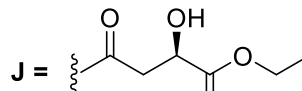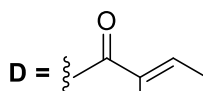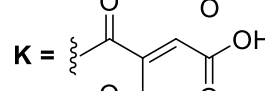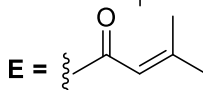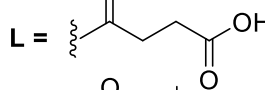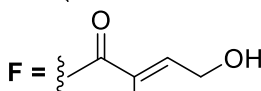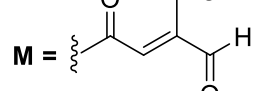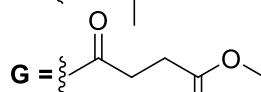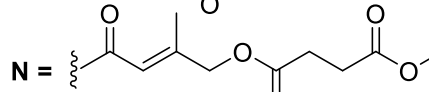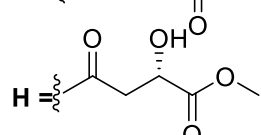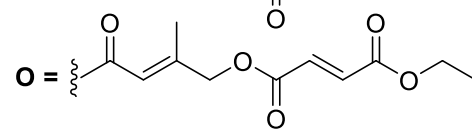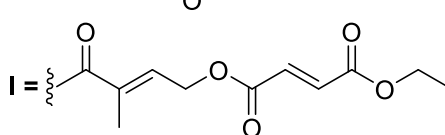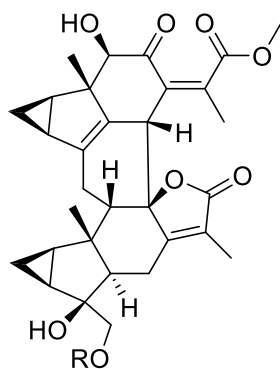

120  $R = C$   
 125  $R = D$   
 127  $R = K$

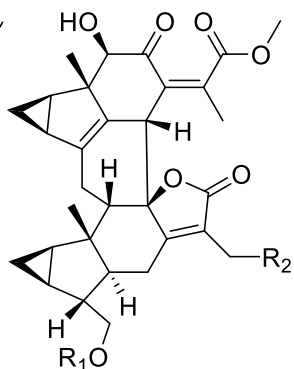

143  $R_1 = H$   $R_2 = OH$   
 146  $R_1 = Ac$   $R_2 = OH$   
 147  $R_1 = Ac$   $R_2 = H$

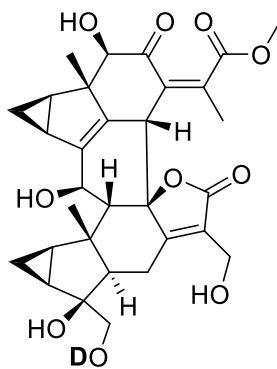

144

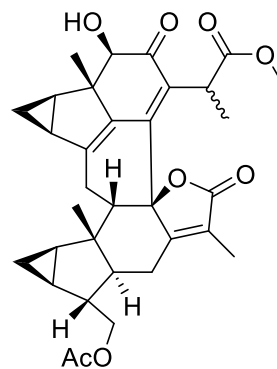

148

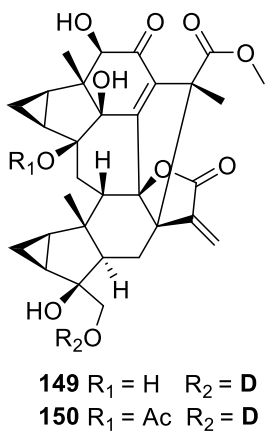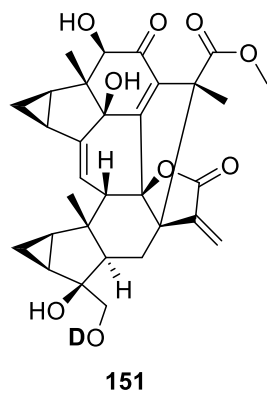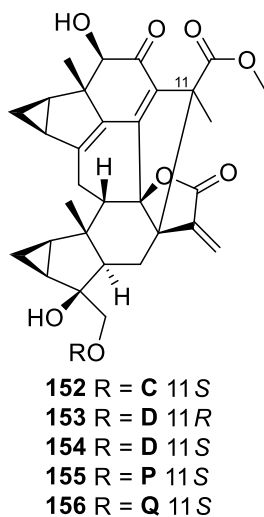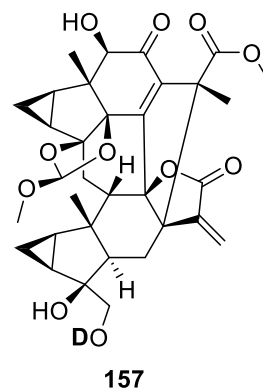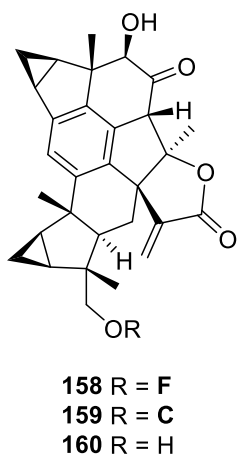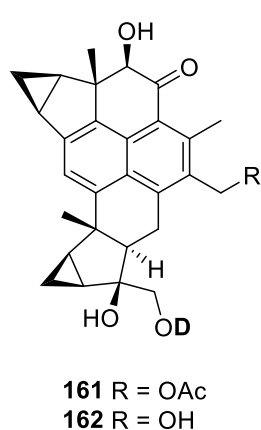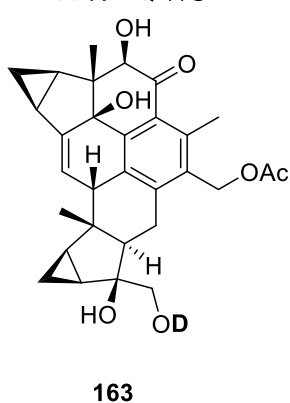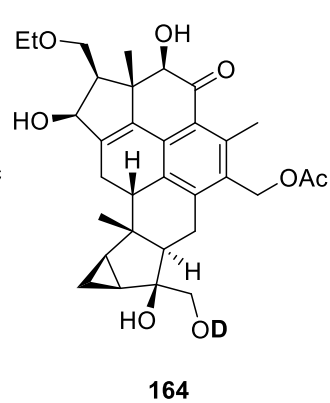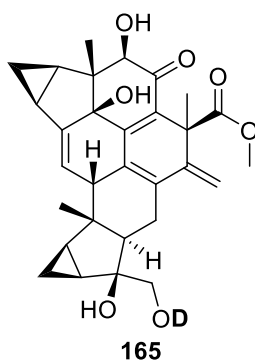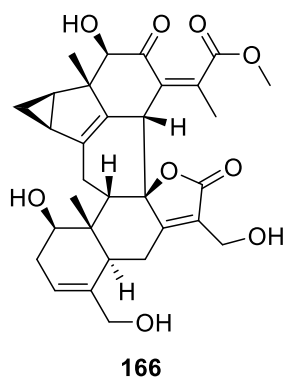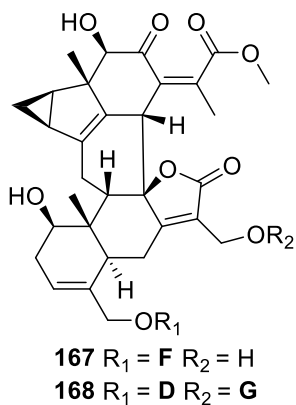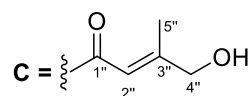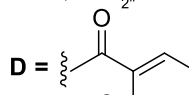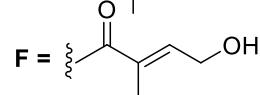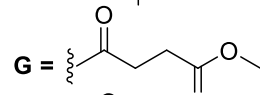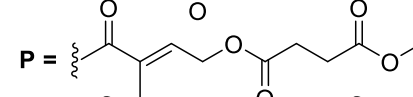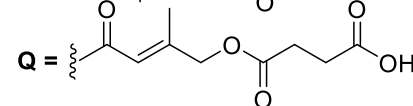

**Table S3-1** Structure names, sources and bioactivity of *homo*-[4 + 2] cycloaddition type LS dimers (111-136).

| No  | Compound                                    | Sources                                                                                                                                                                                                                                                            | Bioactivity                                                      |
|-----|---------------------------------------------|--------------------------------------------------------------------------------------------------------------------------------------------------------------------------------------------------------------------------------------------------------------------|------------------------------------------------------------------|
| 111 | Shizukaol A                                 | <i>C. japonicus</i> , <sup>59-61</sup>                                                                                                                                                                                                                             |                                                                  |
| 112 | Shizukaol A acetate                         | <i>C. serratus</i> , <sup>62</sup> <i>C. fortunei</i> <sup>63</sup><br><i>C. japonicus</i> <sup>64</sup>                                                                                                                                                           |                                                                  |
| 113 | Chlojapolide D                              | <i>C. japonicus</i> <sup>59</sup>                                                                                                                                                                                                                                  |                                                                  |
| 114 | Chlojapolide E                              | <i>C. japonicus</i> <sup>59</sup>                                                                                                                                                                                                                                  |                                                                  |
| 115 | Chlojapolide F                              | <i>C. japonicus</i> <sup>59</sup>                                                                                                                                                                                                                                  |                                                                  |
| 116 | Chlojapolide B                              | <i>C. japonicus</i> <sup>59</sup>                                                                                                                                                                                                                                  |                                                                  |
| 117 | Chololactone D                              | <i>C. holostegius</i> <sup>65</sup>                                                                                                                                                                                                                                |                                                                  |
| 118 | Chlojapolide C                              | <i>C. japonicus</i> <sup>59</sup>                                                                                                                                                                                                                                  |                                                                  |
| 119 | Shizukaol N                                 | <i>C. fortunei</i> , <sup>63</sup> <i>S. glabra</i> <sup>66</sup>                                                                                                                                                                                                  |                                                                  |
| 120 | Shizukaol M                                 | <i>C. fortunei</i> <sup>37, 52, 63</sup>                                                                                                                                                                                                                           | Anti-Inflammatory <sup>52</sup>                                  |
| 121 | Shizukaol I                                 | <i>C. japonicus</i> , <sup>67</sup> <i>C. fortunei</i> <sup>37, 63</sup>                                                                                                                                                                                           |                                                                  |
| 122 | Chlorahololide D (henriol D)                | <i>C. holostegius</i> , <sup>68</sup> <i>C. henryi</i> , <sup>69</sup><br><i>C. fortunei</i> , <sup>37, 63</sup> <i>C. spicatus</i> , <sup>70</sup><br><i>S. glabra</i> , <sup>29</sup> <i>C. serratus</i> <sup>71</sup>                                           | Antimalarial <sup>37</sup>                                       |
| 123 | Shizukaol K                                 | <i>C. fortunei</i> <sup>37, 63</sup>                                                                                                                                                                                                                               |                                                                  |
| 124 | Multistalide B                              | <i>C. multistachys</i> <sup>72</sup>                                                                                                                                                                                                                               |                                                                  |
| 125 | Sarcandrolide A                             | <i>S. glabra</i> <sup>28</sup>                                                                                                                                                                                                                                     | Cytotoxicity <sup>28</sup>                                       |
| 126 | Shizukaol C                                 | <i>C. serratus</i> , <sup>62</sup> <i>S. glabra</i> , <sup>28, 29, 66, 73</sup><br><i>C. multistachys</i> , <sup>74, 75</sup> <i>C. japonicus</i> , <sup>14,</sup><br><sup>60, 76</sup> <i>C. fortunei</i> , <sup>37, 52</sup> <i>C. holostegius</i> <sup>65</sup> | Anti-HIV <sup>60</sup><br>Cytotoxicity <sup>52, 60, 73, 76</sup> |
| 127 | Shizukaol L                                 | <i>C. fortunei</i> <sup>63</sup>                                                                                                                                                                                                                                   |                                                                  |
| 128 | Sarcandrolide B                             | <i>S. glabra</i> <sup>28</sup>                                                                                                                                                                                                                                     | Cytotoxicity <sup>28</sup>                                       |
| 129 | 13'- <i>O</i> -Methyl succinylshizukaol C * | <i>C. japonicus</i> <sup>22</sup>                                                                                                                                                                                                                                  |                                                                  |
| 130 | Chololactone E                              | <i>C. holostegius</i> <sup>65</sup>                                                                                                                                                                                                                                | Anti-Inflammatory <sup>65</sup>                                  |
| 131 | Chololactone F                              | <i>C. japonicus</i> , <sup>60</sup> <i>C. holostegius</i> <sup>65</sup>                                                                                                                                                                                            | Anti-Inflammatory <sup>65</sup>                                  |
| 132 | Sarglabolide H                              | <i>S. glabra</i> <sup>66</sup>                                                                                                                                                                                                                                     |                                                                  |
| 133 | Sarglabolide I                              | <i>S. glabra</i> , <sup>66</sup> <i>C. fortunei</i> <sup>37</sup>                                                                                                                                                                                                  |                                                                  |
| 134 | Sarglabolide J                              | <i>S. glabra</i> , <sup>66</sup> <i>C. fortunei</i> <sup>37</sup>                                                                                                                                                                                                  | Antimalarial <sup>37</sup>                                       |
| 135 | Sarglabolide K                              | <i>S. glabra</i> <sup>66</sup>                                                                                                                                                                                                                                     |                                                                  |
| 136 | Fortunilide M                               | <i>C. fortunei</i> <sup>77</sup>                                                                                                                                                                                                                                   |                                                                  |

The structure of Chlorajaponol (129) with  $\Delta^{4,5}$  double bonds should be of *E*-geometry, revised to 3'-*O*-Methyl succinylshizukaol C.

**Table S3-2** Structure names, sources and bioactivity of *homo*-[4 + 2] cycloaddition type LS dimers (137-163).

| No  | Compound         | Sources                                                                                                                                                                                                                                   | Bioactivity                                                                         |
|-----|------------------|-------------------------------------------------------------------------------------------------------------------------------------------------------------------------------------------------------------------------------------------|-------------------------------------------------------------------------------------|
| 137 | Chlojapolide A   | <i>C. japonicus</i> <sup>59</sup>                                                                                                                                                                                                         | Anti-Inflammatory <sup>59</sup>                                                     |
| 138 | Fortunilide A    | <i>C. fortunei</i> <sup>37</sup>                                                                                                                                                                                                          |                                                                                     |
| 139 | Fortunilide B    | <i>C. fortunei</i> <sup>37</sup>                                                                                                                                                                                                          | Antimalarial <sup>37</sup>                                                          |
| 140 | Fortunilide C    | <i>C. fortunei</i> <sup>37</sup>                                                                                                                                                                                                          |                                                                                     |
| 141 | Chlorahupetol F  | <i>Chloranthus henryi</i> var. <i>hupehensis</i> <sup>78</sup>                                                                                                                                                                            |                                                                                     |
| 142 | Shizukaol O      | <i>C. fortunei</i> <sup>52, 63</sup> , <i>C. japonicus</i> <sup>14</sup>                                                                                                                                                                  | Anti-Inflammatory <sup>52</sup><br>Cytotoxicity <sup>14</sup>                       |
| 143 | Sarcandrolide J  | <i>S. glabra</i> , <sup>29</sup> <i>C. fortunei</i> <sup>37</sup>                                                                                                                                                                         |                                                                                     |
| 144 | Chlomultiol A    | <i>C. multistachys</i> <sup>74</sup>                                                                                                                                                                                                      | Anti-Inflammatory <sup>74</sup>                                                     |
| 145 | Sarcanolide E    | <i>S. glabra</i> <sup>79</sup>                                                                                                                                                                                                            | Anti-Inflammatory <sup>79</sup>                                                     |
| 146 | Shizukaol D      | <i>C. serratus</i> , <sup>62, 71, 80</sup> <i>C. fortunei</i> , <sup>52</sup> <i>C. spicatus</i> , <sup>70</sup><br><i>C. multistachys</i> , <sup>75</sup> <i>S. glabra</i> , <sup>29, 73</sup> <i>C. japonicus</i> <sup>14, 60, 81</sup> | Cytotoxicity <sup>14</sup><br>Anti-Inflammatory <sup>52</sup>                       |
| 147 | Shizukaol E      | <i>C. japonicus</i> , <sup>67, 82, 83</sup><br><i>C. fortunei</i> , <sup>52, 63</sup> <i>S. glabra</i> <sup>28</sup>                                                                                                                      | Anti-Inflammatory <sup>52</sup><br>Anti-HIV <sup>83</sup><br>Anti-HCV <sup>83</sup> |
| 148 | Chololactone G   | <i>C. holostegius</i> <sup>65</sup>                                                                                                                                                                                                       | Anti-Inflammatory <sup>65</sup>                                                     |
| 149 | Sarcanolide A    | <i>S. hainanensis</i> <sup>84</sup>                                                                                                                                                                                                       | Cytotoxicity <sup>84</sup>                                                          |
| 150 | Sarcanolide D    | <i>S. glabra</i> <sup>79</sup>                                                                                                                                                                                                            | Anti-Inflammatory <sup>79</sup>                                                     |
| 151 | Sarcanolide B    | <i>S. hainanensis</i> <sup>84</sup>                                                                                                                                                                                                       | Cytotoxicity <sup>84</sup>                                                          |
| 152 | Fortunilide N    | <i>C. fortunei</i> <sup>77</sup>                                                                                                                                                                                                          |                                                                                     |
| 153 | Chololactone A   | <i>C. holostegius</i> <sup>65</sup>                                                                                                                                                                                                       | Anti-Inflammatory <sup>65</sup>                                                     |
| 154 | Fortunilide K    | <i>C. fortunei</i> <sup>37</sup>                                                                                                                                                                                                          |                                                                                     |
| 155 | Fortunilide L    | <i>C. fortunei</i> <sup>37</sup>                                                                                                                                                                                                          |                                                                                     |
| 156 | Fortunilide O    | <i>C. fortunei</i> <sup>77</sup>                                                                                                                                                                                                          |                                                                                     |
| 157 | Sarcanolide C    | <i>S. glabra</i> <sup>79</sup>                                                                                                                                                                                                            | Anti-Inflammatory <sup>79</sup>                                                     |
| 158 | Chlorahupetone G | <i>C. henryi</i> var. <i>hupehensis</i> <sup>85</sup>                                                                                                                                                                                     | Cytotoxicity <sup>85</sup>                                                          |
| 159 | Chlorahupetone H | <i>C. henryi</i> var. <i>hupehensis</i> <sup>85</sup>                                                                                                                                                                                     | Cytotoxicity <sup>85</sup>                                                          |
| 160 | Chlorahupetone I | <i>C. henryi</i> var. <i>hupehensis</i> <sup>85</sup>                                                                                                                                                                                     | Cytotoxicity <sup>85</sup>                                                          |
| 161 | Sarglaromatic A  | <i>S. glabra</i> <sup>86</sup>                                                                                                                                                                                                            | Anti-Nonalcoholic <sup>86</sup>                                                     |
| 162 | Sarglaromatic B  | <i>S. glabra</i> <sup>86</sup>                                                                                                                                                                                                            | Anti-Nonalcoholic <sup>86</sup>                                                     |
| 163 | Sarglaromatic C  | <i>S. glabra</i> <sup>86</sup>                                                                                                                                                                                                            | Anti-Nonalcoholic <sup>86</sup>                                                     |

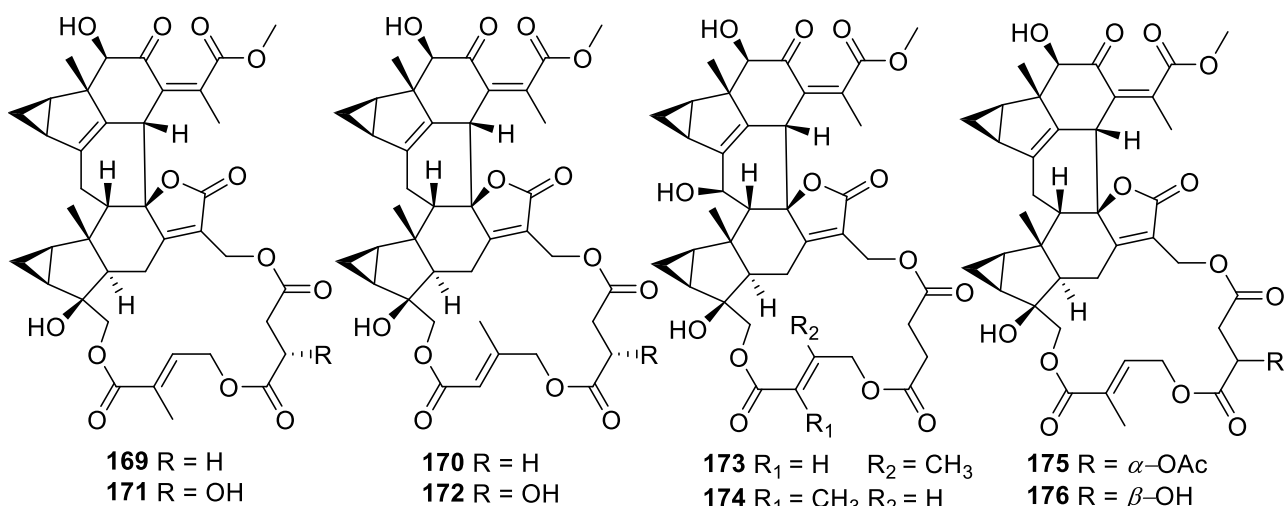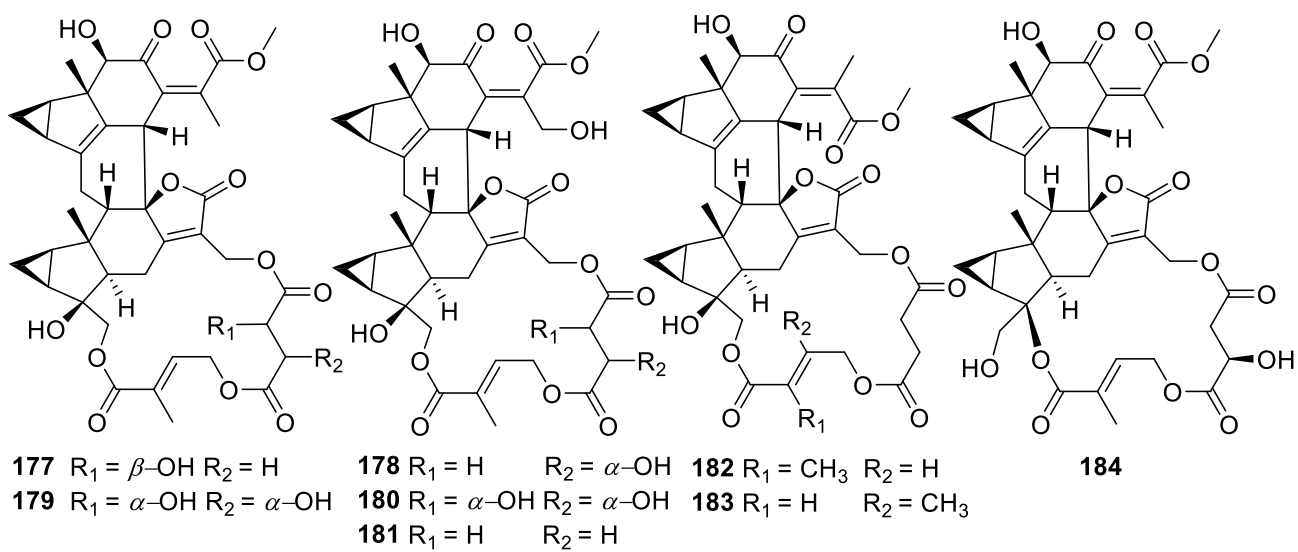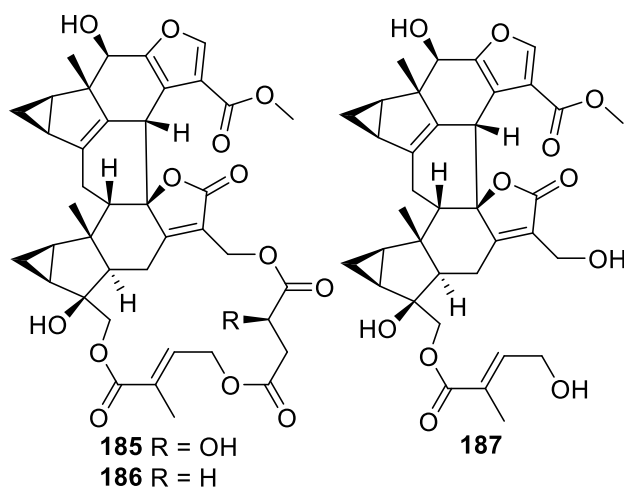

**Table S3-3** Structure names, sources and bioactivity of *homo*-[4 + 2] cycloaddition type LS dimers (164-188).

| No  | Compound                                                         | Sources                                                                                                                                                                                                                                                   | Bioactivity                                                                                                      |
|-----|------------------------------------------------------------------|-----------------------------------------------------------------------------------------------------------------------------------------------------------------------------------------------------------------------------------------------------------|------------------------------------------------------------------------------------------------------------------|
| 164 | Sarglaromatic D                                                  | <i>S. glabra</i> <sup>86</sup>                                                                                                                                                                                                                            |                                                                                                                  |
| 165 | Sarglaromatic E                                                  | <i>S. glabra</i> <sup>86</sup>                                                                                                                                                                                                                            |                                                                                                                  |
| 166 | Fortunoid C                                                      | <i>C. fortunei</i> <sup>39</sup>                                                                                                                                                                                                                          | Antimalarial <sup>39</sup>                                                                                       |
| 167 | 15'- <i>O</i> -(4-Hydroxytigloyl)fortunoid C                     | <i>C. fortunei</i> <sup>87</sup>                                                                                                                                                                                                                          |                                                                                                                  |
| 168 | 13'- <i>O</i> -Methyl succinyl-15'- <i>O</i> -tigloylfortunoid C | <i>S. glabra</i> <sup>87</sup>                                                                                                                                                                                                                            |                                                                                                                  |
| 169 | Shizukaol B                                                      | <i>C. serratus</i> , <sup>62, 71, 80</sup><br><i>C. fortunei</i> , <sup>37, 52, 63</sup><br><i>C. japonicus</i> , <sup>59, 76</sup><br><i>S. glabra</i> , <sup>28, 66</sup> <i>C. spicatus</i> <sup>70</sup> ,<br><i>C. tianmushanensis</i> <sup>45</sup> | Anti-HIV <sup>60, 70</sup><br>Cytotoxicity <sup>52, 60, 70</sup><br>Anti-Inflammatory <sup>14, 66, 76, 88</sup>  |
| 170 | Shizukaol F                                                      | <i>C. japonicus</i> , <sup>59, 60, 67, 76</sup><br><i>C. fortunei</i> , <sup>37, 49, 63</sup> <i>C. spicatus</i> <sup>70</sup>                                                                                                                            | Antimalarial <sup>37</sup><br>Anti-HIV <sup>70</sup><br>Cytotoxicity <sup>70</sup><br>Antimalarial <sup>37</sup> |
| 171 | Shizukaol G                                                      | <i>C. japonicus</i> , <sup>67, 76, 83</sup><br><i>S. glabra</i> , <sup>28, 66</sup> <i>C. fortunei</i> <sup>37, 52</sup>                                                                                                                                  | Anti-Inflammatory <sup>52, 66, 88</sup> Antimalarial <sup>37</sup>                                               |
| 172 | Shizukaol H                                                      | <i>C. japonicus</i> , <sup>60, 67</sup> <i>S. glabra</i> <sup>29</sup>                                                                                                                                                                                    | Anti-HIV <sup>60</sup><br>Cytotoxicity <sup>60</sup>                                                             |
| 173 | Shizukaol P                                                      | <i>C. fortunei</i> , <sup>49</sup> <i>C. spicatus</i> <sup>70</sup>                                                                                                                                                                                       |                                                                                                                  |
| 174 | Chloramultiol A                                                  | <i>C. multistachys</i> <sup>75</sup>                                                                                                                                                                                                                      | Cytotoxicity <sup>75</sup>                                                                                       |
| 175 | Sarcandrolide C                                                  | <i>S. glabra</i> <sup>28</sup>                                                                                                                                                                                                                            |                                                                                                                  |
| 176 | Sarglabolide B                                                   | <i>S. glabra</i> <sup>66</sup>                                                                                                                                                                                                                            |                                                                                                                  |
| 177 | Sarglabolide C                                                   | <i>S. glabra</i> <sup>66</sup>                                                                                                                                                                                                                            | Cytotoxicity <sup>66</sup>                                                                                       |
| 178 | Sarglabolide D                                                   | <i>S. glabra</i> <sup>66</sup>                                                                                                                                                                                                                            |                                                                                                                  |
| 179 | Sarglabolide E                                                   | <i>S. glabra</i> <sup>66</sup>                                                                                                                                                                                                                            |                                                                                                                  |
| 180 | Sarglabolide F                                                   | <i>S. glabra</i> <sup>66</sup>                                                                                                                                                                                                                            |                                                                                                                  |
| 181 | Sarglabolide G                                                   | <i>S. glabra</i> <sup>66</sup>                                                                                                                                                                                                                            |                                                                                                                  |
| 182 | Henriol C                                                        | <i>C. henryi</i> , <sup>69</sup> <i>C. serratus</i> <sup>71</sup>                                                                                                                                                                                         | Cytotoxicity <sup>69</sup>                                                                                       |
| 183 | Fortunilide G                                                    | <i>C. fortunei</i> , <sup>37</sup> <i>C. holostegius</i> <sup>65</sup>                                                                                                                                                                                    |                                                                                                                  |
| 184 | Sarglabolide A                                                   | <i>S. glabra</i> <sup>66</sup>                                                                                                                                                                                                                            | Anti-Inflammatory <sup>66</sup>                                                                                  |
| 185 | Sarglafuran A                                                    | <i>S. glabra</i> <sup>89</sup>                                                                                                                                                                                                                            |                                                                                                                  |
| 186 | Chlorahupetol C                                                  | <i>C. henryi</i> var. <i>hupehensis</i> <sup>78</sup>                                                                                                                                                                                                     |                                                                                                                  |
| 187 | Chlorahupetol D                                                  | <i>C. henryi</i> var. <i>hupehensis</i> <sup>78</sup>                                                                                                                                                                                                     |                                                                                                                  |
| 188 | Chlorahololide A                                                 | <i>C. holostegius</i> <sup>90</sup>                                                                                                                                                                                                                       | Voltagegated potassium activity <sup>90</sup>                                                                    |

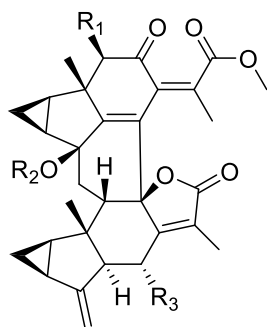

**188** R<sub>1</sub> = H R<sub>2</sub> = H R<sub>3</sub> = OAc  
**189** R<sub>1</sub> = OH R<sub>2</sub> = H R<sub>3</sub> = OAc  
**190** R<sub>1</sub> = OH R<sub>2</sub> = OH R<sub>3</sub> = H

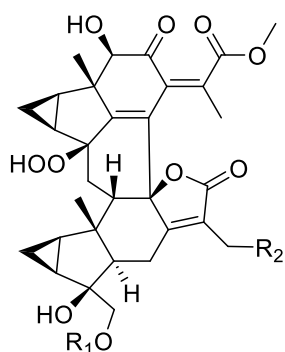

**191** R<sub>1</sub> = D R<sub>2</sub> = OAc  
**194** R<sub>1</sub> = D R<sub>2</sub> = OH  
**197** R<sub>1</sub> = N R<sub>2</sub> = OH  
**198** R<sub>1</sub> = C R<sub>2</sub> = OG  
**199** R<sub>1</sub> = H R<sub>2</sub> = H

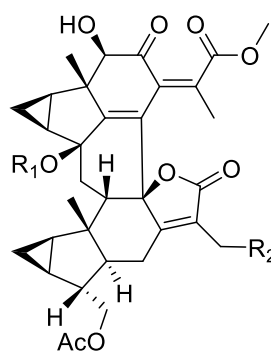

**192** R<sub>1</sub> = OH R<sub>2</sub> = OH  
**195** R<sub>1</sub> = H R<sub>2</sub> = OH  
**200** R<sub>1</sub> = OH R<sub>2</sub> = H

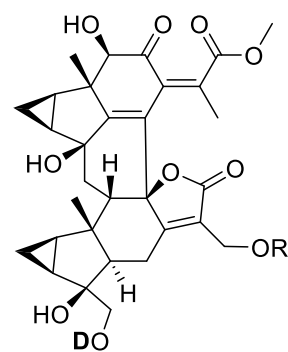

**193** R = Ac  
**196** R = H

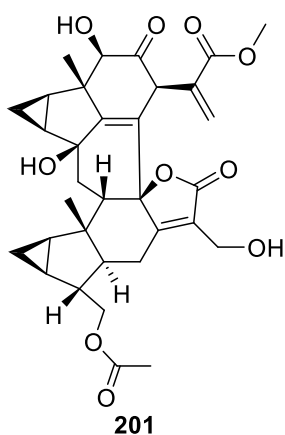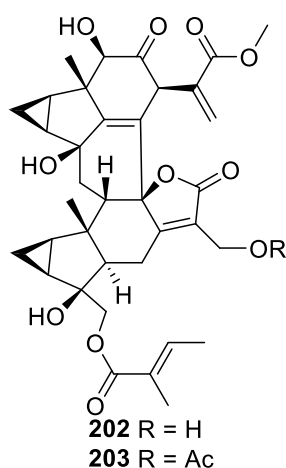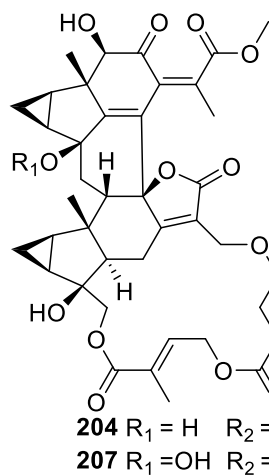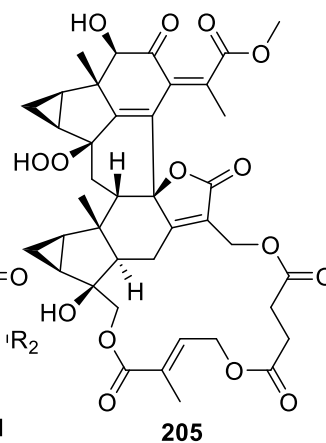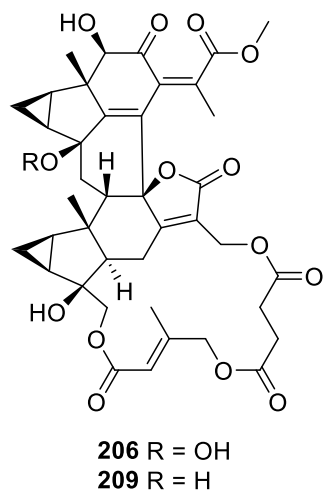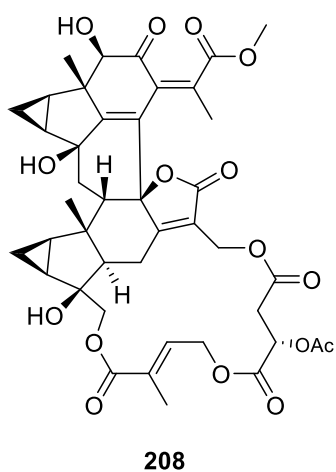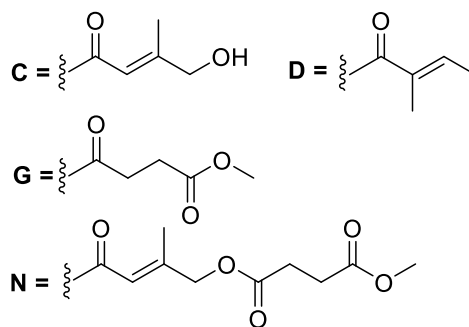



**Table S3-4** Structure names, sources and bioactivity of *homo*-[4 + 2] cycloaddition type LS dimers (189-215).

| No  | Compound           | Sources                                                                                                    | Bioactivity                                                                    |
|-----|--------------------|------------------------------------------------------------------------------------------------------------|--------------------------------------------------------------------------------|
| 189 | Chlorahololide C   | <i>C. holostegius</i> , <sup>68</sup> <i>C. japonicus</i> <sup>59</sup>                                    |                                                                                |
| 190 | Spicachlorantin J  | <i>C. spicatus</i> , <sup>70</sup> <i>C. japonicus</i> <sup>59</sup>                                       |                                                                                |
| 191 | Spicachlorantin E  | <i>C. spicatus</i> <sup>91</sup>                                                                           |                                                                                |
| 192 | Spicachlorantin F  | <i>C. spicatus</i> , <sup>91</sup> <i>S. glabra</i> <sup>29</sup>                                          |                                                                                |
| 193 | Sarcandrolide E    | <i>S. glabra</i> <sup>28, 29, 73</sup>                                                                     | Cytotoxicity <sup>73</sup>                                                     |
| 194 | Chlorajaponilide E | <i>C. japonicus</i> , <sup>60</sup> <i>S. glabra</i> <sup>29</sup>                                         |                                                                                |
| 195 | Spicachlorantin G  | <i>C. spicatus</i> <sup>70</sup>                                                                           |                                                                                |
| 196 | Chlorasessilifol A | <i>C. sessilifolius</i> <sup>40</sup>                                                                      |                                                                                |
| 197 | Fortunilide D      | <i>C. fortunei</i> <sup>37</sup>                                                                           |                                                                                |
| 198 | Fortunilide E      | <i>C. fortunei</i> <sup>37</sup>                                                                           |                                                                                |
| 199 | Fortunilide F      | <i>C. fortunei</i> <sup>37</sup>                                                                           |                                                                                |
| 200 | Chololactone B     | <i>C. holostegius</i> <sup>65</sup>                                                                        | Anti-Inflammatory <sup>65</sup>                                                |
| 201 | Multistalide A     | <i>C. multistachys</i> <sup>72</sup>                                                                       |                                                                                |
| 202 | Chlomultiol B      | <i>C. multistachys</i> <sup>74</sup>                                                                       | Anti-Inflammatory <sup>74</sup>                                                |
| 203 | Sarcaglabrin B     | <i>S. glabra</i> <sup>73</sup>                                                                             |                                                                                |
| 204 | Chloramultilide A  | <i>C. multistachys</i> , <sup>92</sup> <i>C. spicatus</i> <sup>70, 93</sup>                                |                                                                                |
| 205 | Spicachlorantin C  | <i>C. spicatus</i> <sup>91</sup>                                                                           |                                                                                |
| 206 | Spicachlorantin D  | <i>C. spicatus</i> , <sup>91</sup> <i>C. fortunei</i> , <sup>37</sup><br><i>C. japonicus</i> <sup>94</sup> |                                                                                |
| 207 | Sarcandrolide G    | <i>S. glabra</i> , <sup>29</sup> <i>C. japonicus</i> <sup>83</sup>                                         |                                                                                |
| 208 | Sarcandrolide H    | <i>S. glabra</i> <sup>29</sup>                                                                             | Cytotoxicity <sup>29</sup>                                                     |
| 209 | Chlorajaponilide H | <i>C. japonicus</i> <sup>83</sup>                                                                          |                                                                                |
| 210 | Sarcandrolide F    | <i>S. glabra</i> , <sup>29</sup> <i>C. japonicus</i> <sup>83</sup>                                         | Cytotoxicity <sup>29</sup><br>Anti-HIV <sup>83</sup><br>Anti-HCV <sup>83</sup> |
| 211 | Chlorajaponilide F | <i>C. japonicus</i> <sup>83</sup>                                                                          | Anti-HIV <sup>83</sup><br>Anti-HCV <sup>83</sup>                               |
| 212 | Chlorajaponilide I | <i>C. japonicus</i> <sup>94</sup>                                                                          |                                                                                |
| 213 | Chlorajaponilide G | <i>C. japonicus</i> <sup>83</sup>                                                                          |                                                                                |
| 214 | Chlorahololide E   | <i>C. holostegius</i> <sup>68</sup>                                                                        | Voltagegated potassium activity <sup>68</sup>                                  |
| 215 | Spicachlorantin H  | <i>C. spicatus</i> , <sup>70</sup> <i>C. japonicus</i> <sup>59, 83</sup>                                   |                                                                                |

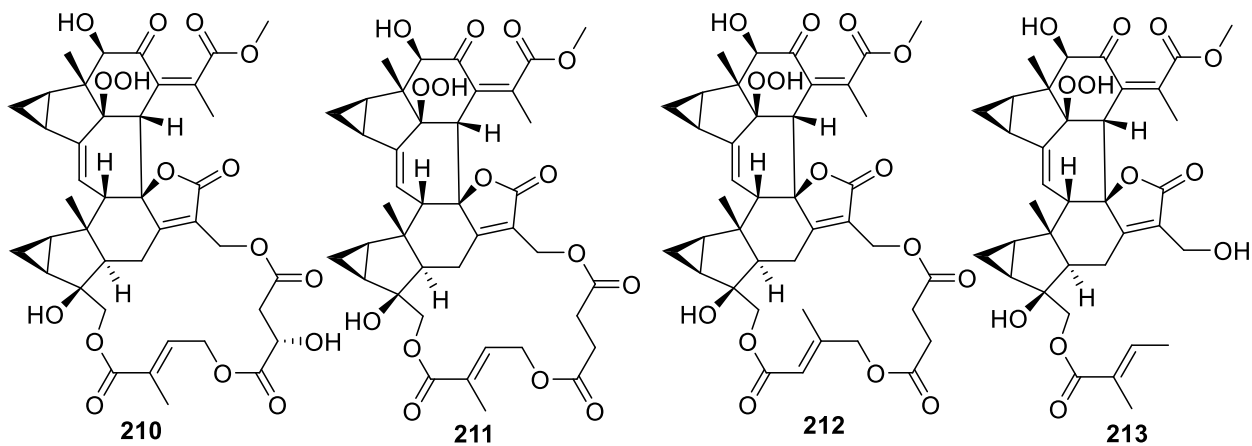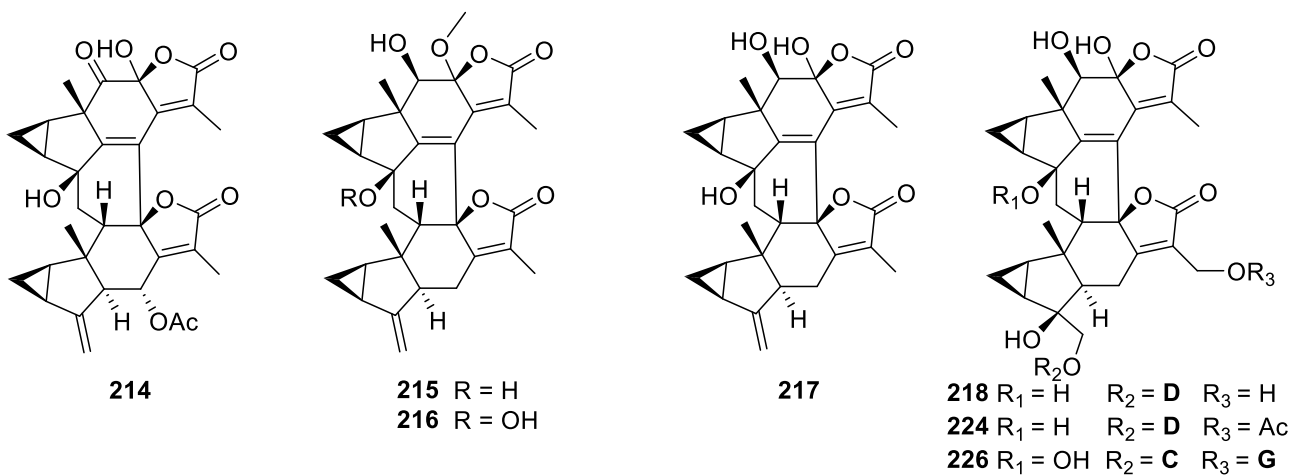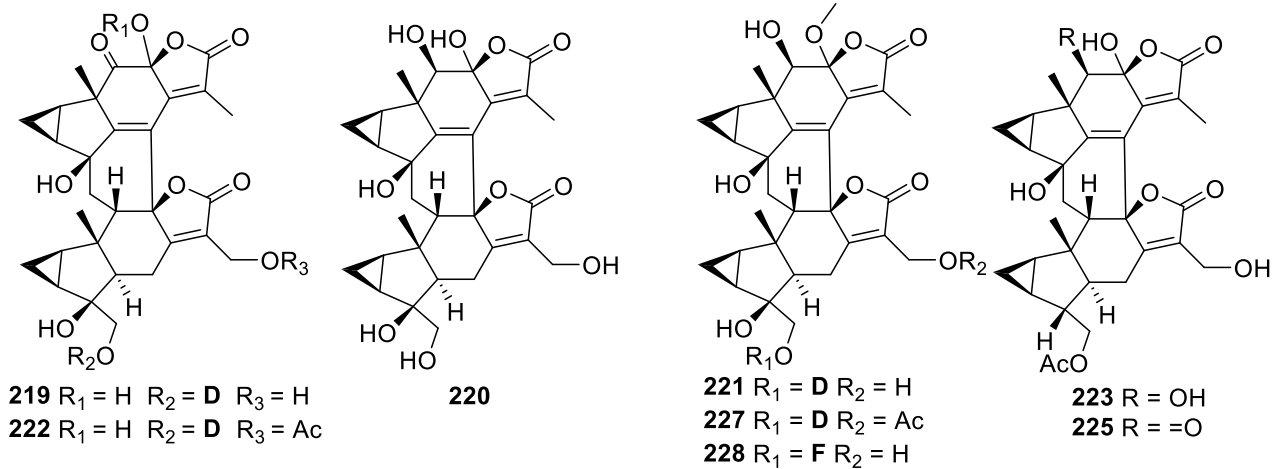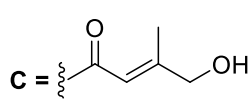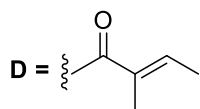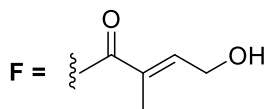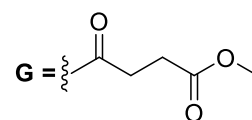

**Table S3-5** Structure names, sources and bioactivity of *homo*-[4 + 2] cycloaddition type LS dimers (216-240).

| No  | Compound                        | Sources                                                                                                                                                                                                  | Bioactivity                                   |
|-----|---------------------------------|----------------------------------------------------------------------------------------------------------------------------------------------------------------------------------------------------------|-----------------------------------------------|
| 216 | Spicachlorantin I               | <i>C. spicatus</i> <sup>70</sup>                                                                                                                                                                         |                                               |
| 217 | Chlojapolide G                  | <i>C. japonicus</i> <sup>83</sup>                                                                                                                                                                        |                                               |
| 218 | Chloramultilide D               | <i>C. spicatus</i> <sup>95</sup>                                                                                                                                                                         |                                               |
| 219 | Chloramultiol D                 | <i>C. multistachys</i> <sup>75</sup>                                                                                                                                                                     | Cytotoxicity <sup>75</sup>                    |
| 220 | Chloramultiol B                 | <i>C. multistachys</i> <sup>75</sup>                                                                                                                                                                     | Cytotoxicity <sup>75</sup>                    |
| 221 | Chloramultiol C                 | <i>C. multistachys</i> <sup>75</sup>                                                                                                                                                                     | Cytotoxicity <sup>75</sup>                    |
| 222 | Chlorahololide F                | <i>C. holostegius</i> , <sup>68</sup> <i>S. glabra</i> <sup>28</sup>                                                                                                                                     |                                               |
| 223 | Chloramultiol E                 | <i>C. multistachys</i> <sup>75</sup>                                                                                                                                                                     | Cytotoxicity <sup>75</sup>                    |
| 224 | Sarcandrolide D                 | <i>S. glabra</i> , <sup>28, 29, 73</sup> <i>C. serratus</i> <sup>71</sup>                                                                                                                                | Cytotoxicity                                  |
| 225 | Chlorasessilifol B              | <i>C. sessilifolius</i> <sup>40</sup>                                                                                                                                                                    |                                               |
| 226 | Fortunilide I                   | <i>C. fortunei</i> <sup>37</sup>                                                                                                                                                                         |                                               |
| 227 | Sarcaglabrin C                  | <i>S. glabra</i> <sup>73</sup>                                                                                                                                                                           |                                               |
| 228 | chlorahupetol E                 | <i>C. henryi</i> var. <i>hupehensis</i> <sup>78</sup>                                                                                                                                                    |                                               |
| 229 | Chlorahololide B                | <i>C. holostegius</i> , <sup>90</sup><br><i>C. japonicus</i> <sup>60</sup>                                                                                                                               | Voltagegated potassium activity <sup>90</sup> |
| 230 | Chloramultilide B               | <i>C. spicatus</i> , <sup>95</sup> <i>C. fortunei</i> , <sup>49</sup><br><i>C. japonicus</i> , <sup>59, 83, 94</sup><br><i>C. serratus</i> <sup>71</sup>                                                 | Antifungal <sup>95</sup>                      |
| 231 | Chloramultilide C               | <i>C. spicatus</i> , <sup>95</sup> <i>C. henryi</i> , <sup>69</sup><br><i>C. multistachys</i> , <sup>75</sup><br><i>C. japonicus</i> , <sup>60, 94</sup> <i>C. fortunei</i> <sup>37</sup>                |                                               |
| 232 | Tianmushanol                    | <i>C. tianmushanensis</i> , <sup>45</sup><br><i>C. multistachys</i> <sup>74</sup>                                                                                                                        |                                               |
| 233 | 8- <i>O</i> -methyltianmushanol | <i>C. tianmushanensis</i> , <sup>45</sup><br><i>C. spicatus</i> , <sup>93</sup> <i>C. multistachys</i> , <sup>75</sup><br><i>C. japonicus</i> , <sup>60, 88</sup> <i>C. serratus</i> <sup>71</sup>       | Tyrosinase Inhibitory <sup>45</sup>           |
| 234 | Yinxiancaol                     | <i>C. japonicus</i> , <sup>60, 82</sup> <i>C. fortunei</i> <sup>49</sup>                                                                                                                                 |                                               |
| 235 | Spicachlorantin A               | <i>C. spicatus</i> , <sup>93</sup><br><i>C. japonicus</i> , <sup>59, 60</sup><br><i>C. serratus</i> , <sup>71</sup><br><i>C. tianmushanensis</i> , <sup>45</sup><br><i>C. multistachys</i> <sup>75</sup> |                                               |
| 236 | Chlorajaponilide D              | <i>C. japonicus</i> <sup>60</sup>                                                                                                                                                                        |                                               |
| 237 | chloraserratolide A             | <i>C. serratus</i> <sup>80</sup>                                                                                                                                                                         |                                               |
| 238 | Sarcandrolide I                 | <i>S. glabra</i> <sup>29</sup>                                                                                                                                                                           |                                               |
| 239 | Chlomultiol C                   | <i>C. multistachys</i> <sup>74</sup>                                                                                                                                                                     | Anti-Inflammatory <sup>74</sup>               |
| 240 | chloraserratolide B             | <i>C. serratus</i> <sup>80</sup>                                                                                                                                                                         | Anti-Inflammatory <sup>80</sup>               |

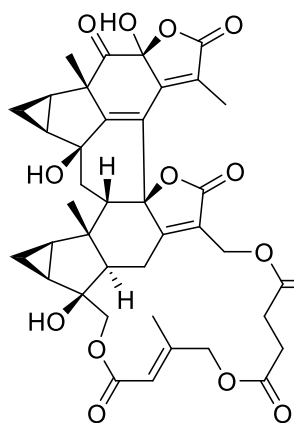

**229**

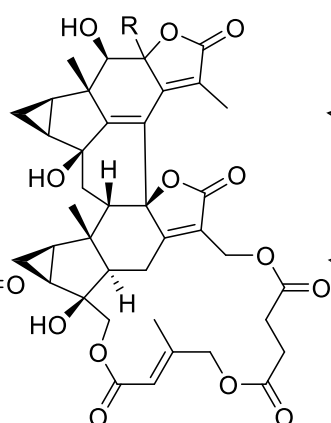

**230** R =  $\alpha$ -OH  
**234** R =  $\beta$ -OCH<sub>3</sub>

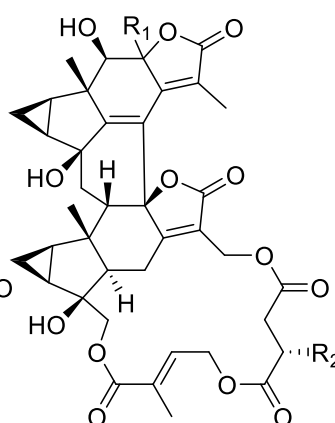

**231** R<sub>1</sub> =  $\alpha$ -OH R<sub>2</sub> = H  
**232** R<sub>1</sub> =  $\beta$ -OH R<sub>2</sub> = H  
**233** R<sub>1</sub> =  $\beta$ -OCH<sub>3</sub> R<sub>2</sub> = H  
**239** R<sub>1</sub> =  $\alpha$ -OH R<sub>2</sub> = OH

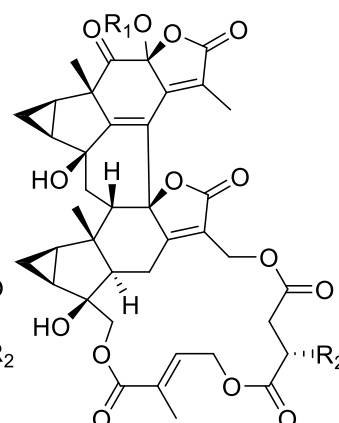

**235** R<sub>1</sub> = H R<sub>2</sub> = H  
**236** R<sub>1</sub> = CH<sub>3</sub> R<sub>2</sub> = H  
**237** R<sub>1</sub> = C<sub>2</sub>H<sub>5</sub> R<sub>2</sub> = H  
**238** R<sub>1</sub> = H R<sub>2</sub> = OAc

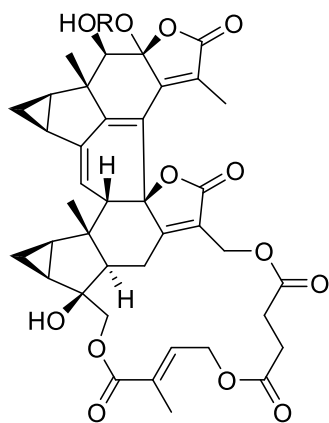

**240** R = H  
**241** R = CH<sub>3</sub>

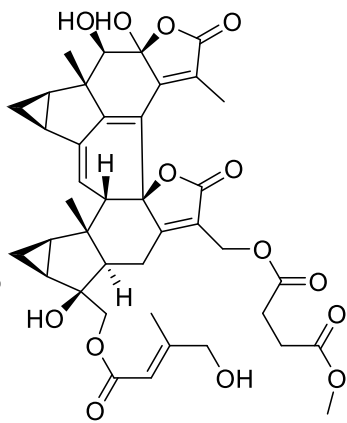

**242**

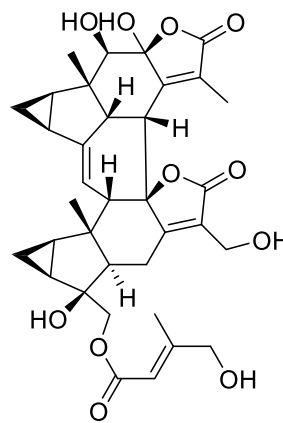

**243**

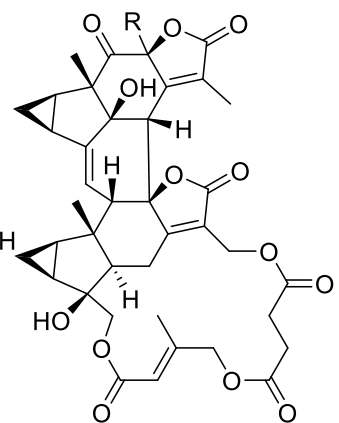

**244** R = H  
**245** R = OH

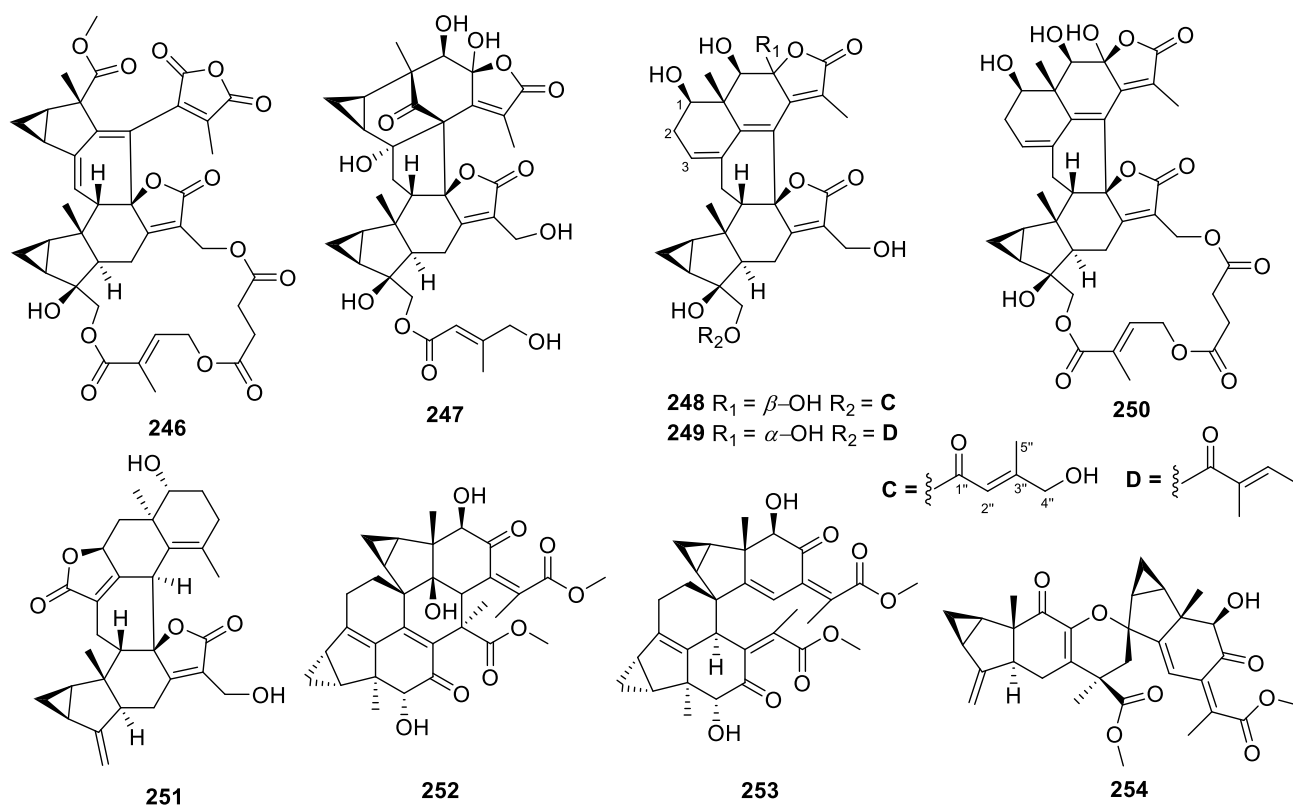

**Table S3-6** Structure names, sources and bioactivity of *homo*-[4 + 2] cycloaddition type LS dimers (241-254).

| No         | Compound           | Sources                                               | Bioactivity                     |
|------------|--------------------|-------------------------------------------------------|---------------------------------|
| <b>241</b> | Chloramultiol F    | <i>C. multistachys</i> <sup>75</sup>                  | Cytotoxicity <sup>75</sup>      |
| <b>242</b> | Fortunilide H      | <i>C. fortunei</i> <sup>37</sup>                      |                                 |
| <b>243</b> | Fortunilide J      | <i>C. fortunei</i> <sup>37</sup>                      |                                 |
| <b>244</b> | Chlorajaponilide A | <i>C. japonicus</i> <sup>60</sup>                     |                                 |
| <b>245</b> | Chlorajaponilide B | <i>C. japonicus</i> <sup>60</sup>                     |                                 |
| <b>246</b> | Chloramultiol G    | <i>C. multistachys</i> <sup>60</sup>                  |                                 |
| <b>247</b> | Fortunoid A        | <i>C. fortunei</i> <sup>39</sup>                      | Antimalarial <sup>39</sup>      |
| <b>248</b> | Fortunoid B        | <i>C. fortunei</i> <sup>39</sup>                      | Antimalarial <sup>39</sup>      |
| <b>249</b> | Chlorahupetol B    | <i>C. henryi</i> var. <i>hupehensis</i> <sup>78</sup> |                                 |
| <b>250</b> | Chlorahupetol A    | <i>C. henryi</i> var. <i>hupehensis</i> <sup>78</sup> |                                 |
| <b>251</b> | Horienoid B        | <i>H. orientale</i> <sup>96</sup>                     | Anti-Inflammatory <sup>96</sup> |
| <b>252</b> | Chlotrichene A     | <i>C. holostegius</i> <sup>97</sup>                   |                                 |
| <b>253</b> | Chlotrichene B     | <i>C. holostegius</i> <sup>97</sup>                   | Cytotoxicity <sup>97</sup>      |
| <b>254</b> | Spirolindemer A    | <i>C. henryi</i> <sup>98</sup>                        | Anti-Inflammatory <sup>98</sup> |

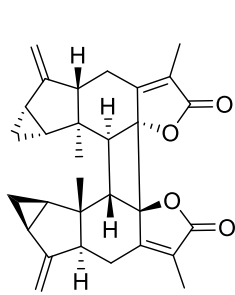

255

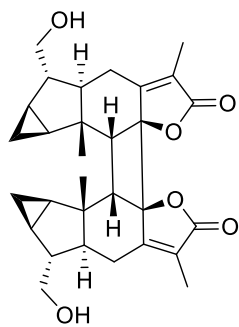

256

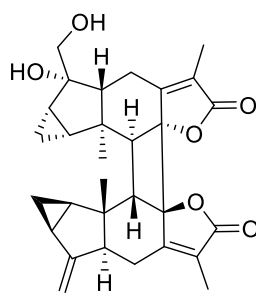

257

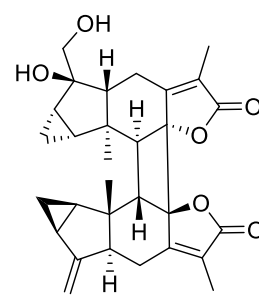

258

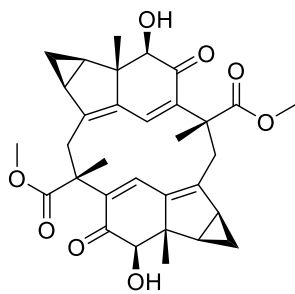

259

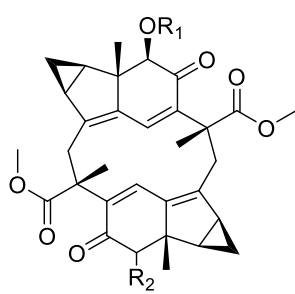

260 R<sub>1</sub> = Glu R<sub>2</sub> = β-OH

261 R<sub>1</sub> = H R<sub>2</sub> = H

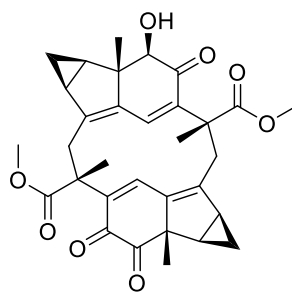

262

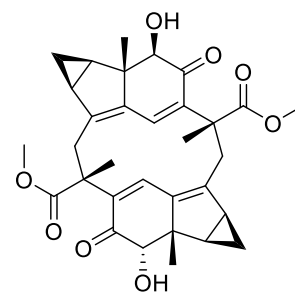

263

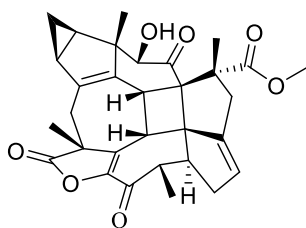

264

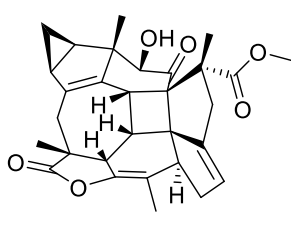

265

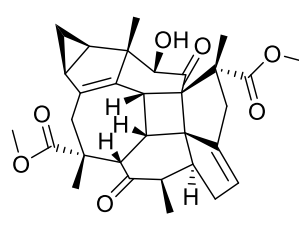

266

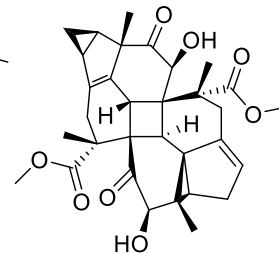

267

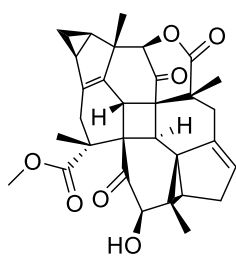

268

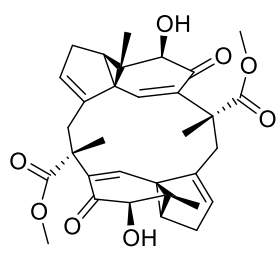

269

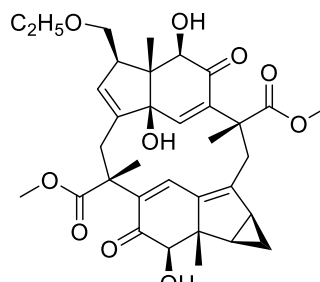

270

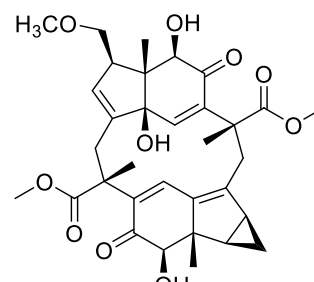

271

**Table S4** Structure names, sources and bioactivity of *homo*-[2 + 2] and [6 + 6] cycloaddition type LS dimers (255-271).

| No  | Compound                                                     | Sources                                                                                                                                                                                                                                                                           | Bioactivity                      |
|-----|--------------------------------------------------------------|-----------------------------------------------------------------------------------------------------------------------------------------------------------------------------------------------------------------------------------------------------------------------------------|----------------------------------|
| 255 | Chloranthalactone F                                          | <i>C. japonicus</i> <sup>64</sup>                                                                                                                                                                                                                                                 |                                  |
| 256 | Chololactone H                                               | <i>C. holostegius</i> <sup>65</sup>                                                                                                                                                                                                                                               | Anti-Inflammatory <sup>65</sup>  |
| 257 | Sarglactone N                                                | <i>S. glabra</i> <sup>89</sup>                                                                                                                                                                                                                                                    |                                  |
| 258 | Sarglactone O                                                | <i>S. glabra</i> <sup>89</sup>                                                                                                                                                                                                                                                    |                                  |
| 259 | Cycloshizukaol A                                             | <i>C. serratus</i> , <sup>99</sup> <i>C. fortunei</i> , <sup>49</sup><br><i>C. multistachys</i> , <sup>75</sup> <i>S. glabra</i> , <sup>28</sup> <i>C.</i><br><i>spicatus</i> , <sup>70</sup> <i>C. japonicus</i> , <sup>60</sup> <i>C.</i><br><i>sessilifolius</i> <sup>40</sup> |                                  |
| 260 | 9- <i>O</i> - $\beta$ -<br>glucopyranosylcycloshizukaol<br>A | <i>C. fortunei</i> , <sup>49</sup> <i>C. japonicus</i> <sup>76</sup>                                                                                                                                                                                                              |                                  |
| 261 | Japonicone A                                                 | <i>C. japonicus</i> <sup>100</sup>                                                                                                                                                                                                                                                |                                  |
| 262 | Japonicone B                                                 | <i>C. japonicus</i> <sup>100</sup>                                                                                                                                                                                                                                                | Cytotoxicity <sup>100</sup>      |
| 263 | Japonicone C                                                 | <i>C. japonicus</i> <sup>100</sup>                                                                                                                                                                                                                                                |                                  |
| 264 | Chlorahupetone A                                             | <i>C. henryi</i> var. <i>hupehensis</i> <sup>85</sup>                                                                                                                                                                                                                             | Cytotoxicity <sup>85</sup>       |
| 265 | Chlorahupetone B                                             | <i>C. henryi</i> var. <i>hupehensis</i> <sup>85</sup>                                                                                                                                                                                                                             |                                  |
| 266 | Chlorahupetone C                                             | <i>C. henryi</i> var. <i>hupehensis</i> <sup>85</sup>                                                                                                                                                                                                                             |                                  |
| 267 | Chlorahupetone D                                             | <i>C. henryi</i> var. <i>hupehensis</i> <sup>85</sup>                                                                                                                                                                                                                             |                                  |
| 268 | Chlorahupetone E                                             | <i>C. henryi</i> var. <i>hupehensis</i> <sup>85</sup>                                                                                                                                                                                                                             |                                  |
| 269 | Chlorahupetone F                                             | <i>C. henryi</i> var. <i>hupehensis</i> <sup>85</sup>                                                                                                                                                                                                                             |                                  |
| 270 | Chlospicene A                                                | <i>C. henryi</i> <sup>101</sup>                                                                                                                                                                                                                                                   | Anti-nonalcoholic <sup>101</sup> |
| 271 | Chlospicene B                                                | <i>C. henryi</i> <sup>101</sup>                                                                                                                                                                                                                                                   | Anti-nonalcoholic <sup>101</sup> |

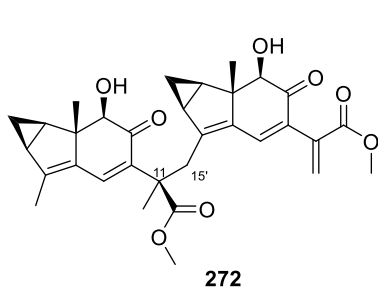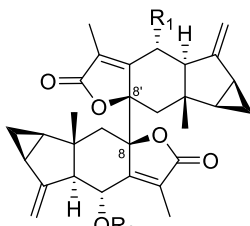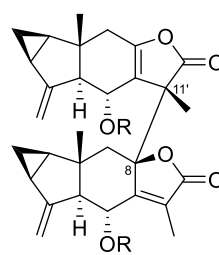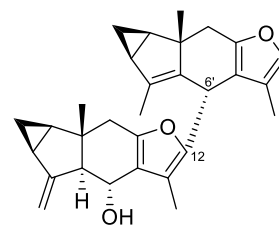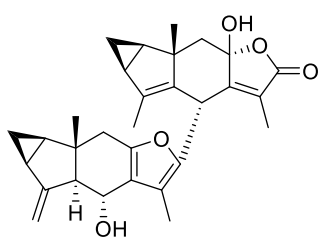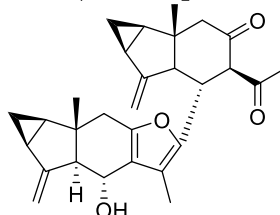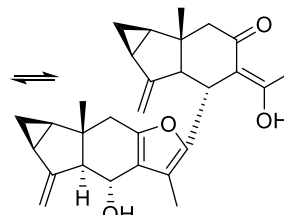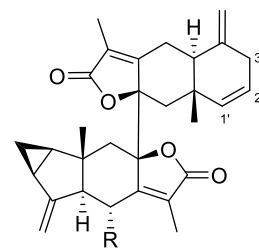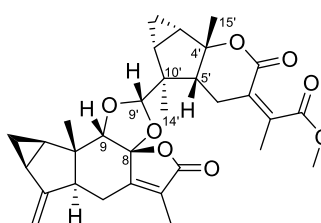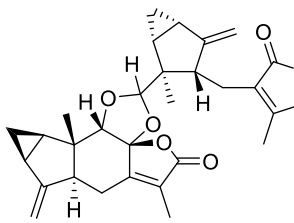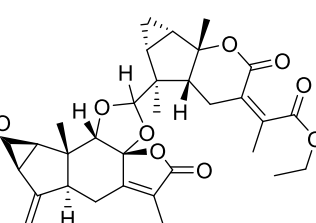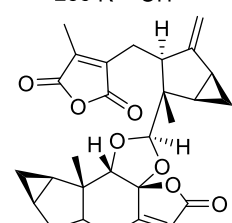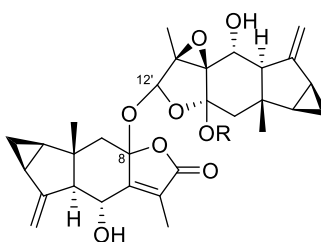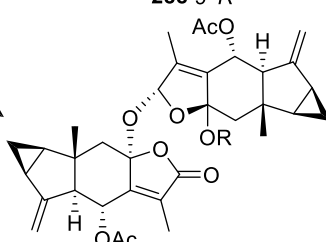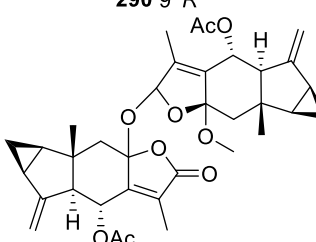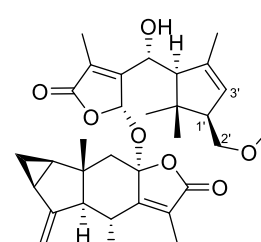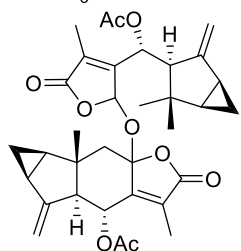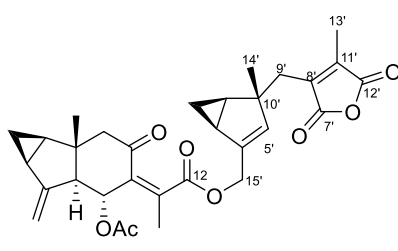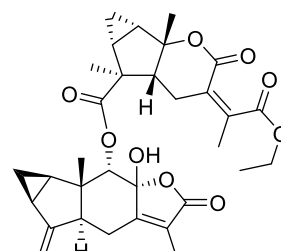



**Table S5-1** Structure names, sources and bioactivity of *homo*-linear linkage type LS dimers (272-298).

| No  | Compound            | Sources                                                                | Bioactivity                     |
|-----|---------------------|------------------------------------------------------------------------|---------------------------------|
| 272 | Shizukaol J         | <i>C. japonicus</i> , <sup>102</sup> <i>C. fortunei</i> <sup>563</sup> |                                 |
| 273 | Lindenanolide F     | <i>L. aggregata</i> , <sup>103</sup> <i>L. chunii</i> <sup>104</sup>   |                                 |
| 274 | Linderanoid L       | <i>L. aggregata</i> <sup>103</sup>                                     |                                 |
| 275 | Linderanoid M       | <i>L. aggregata</i> <sup>103</sup>                                     |                                 |
| 276 | Linderanoid N       | <i>L. aggregata</i> <sup>103</sup>                                     |                                 |
| 277 | Linderanoid O       | <i>L. aggregata</i> <sup>103</sup>                                     |                                 |
| 278 | Linderanoid J       | <i>L. aggregata</i> <sup>103</sup>                                     |                                 |
| 279 | Lindenanolide I     | <i>L. chunii</i> <sup>104</sup>                                        |                                 |
| 280 | Linderanoid H       | <i>L. aggregata</i> <sup>103</sup>                                     |                                 |
| 281 | Linderanoid I       | <i>L. aggregata</i> <sup>103</sup>                                     |                                 |
| 282 | Linderanoid Ka      | <i>L. aggregata</i> <sup>103</sup>                                     |                                 |
| 283 | Linderanoid Kb      | <i>L. aggregata</i> <sup>103</sup>                                     |                                 |
| 284 | Linderanoid D       | <i>L. aggregata</i> <sup>103</sup>                                     |                                 |
| 285 | Linderanoid E       | <i>L. aggregata</i> <sup>103</sup>                                     |                                 |
| 286 | Chlojapolactone A   | <i>C. japonicus</i> <sup>88</sup>                                      | Anti-Inflammatory <sup>88</sup> |
| 287 | Sarglactone D       | <i>S. glabra</i> <sup>58</sup>                                         | Cytotoxicity <sup>58</sup>      |
| 288 | Sarglactone E       | <i>S. glabra</i> <sup>58</sup>                                         | Cytotoxicity <sup>58</sup>      |
| 289 | Sarglactone F       | <i>S. glabra</i> <sup>58</sup>                                         | Cytotoxicity <sup>58</sup>      |
| 290 | Sarglactone G       | <i>S. glabra</i> <sup>58</sup>                                         | Cytotoxicity <sup>58</sup>      |
| 291 | Chlojapolactone B   | <i>C. japonicus</i> <sup>105</sup>                                     |                                 |
| 292 | Linderaggrenolide A | <i>L. aggregata</i> <sup>106</sup>                                     |                                 |
| 293 | Linderaggrenolide B | <i>L. aggregata</i> <sup>106</sup>                                     |                                 |
| 294 | Linderaggrenolide C | <i>L. aggregata</i> <sup>106</sup>                                     |                                 |
| 295 | Linderaggrenolide D | <i>L. aggregata</i> <sup>106</sup>                                     |                                 |
| 296 | Linderaggrenolide E | <i>L. aggregata</i> <sup>106</sup>                                     |                                 |
| 297 | Linderaggrenolide F | <i>L. aggregata</i> <sup>106</sup>                                     |                                 |
| 298 | Linderaggrenolide G | <i>L. aggregata</i> <sup>106</sup>                                     |                                 |

**Table S5-2** Structure names, sources and bioactivity of *homo*-linear linkage type LS dimers (**299-304**).

| No         | Compound            | Sources                            | Bioactivity                |
|------------|---------------------|------------------------------------|----------------------------|
| <b>299</b> | Linderaggrenolide J | <i>L. aggregata</i> <sup>106</sup> |                            |
| <b>300</b> | Linderaggrenolide K | <i>L. aggregata</i> <sup>106</sup> |                            |
| <b>301</b> | Linderaggrenolide L | <i>L. aggregata</i> <sup>106</sup> |                            |
| <b>302</b> | Linderaggrenolide M | <i>L. aggregata</i> <sup>106</sup> |                            |
| <b>303</b> | Linderaggrenolide N | <i>L. aggregata</i> <sup>106</sup> |                            |
| <b>304</b> | Sarglactone H       | <i>S. glabra</i> <sup>58</sup>     | Cytotoxicity <sup>58</sup> |

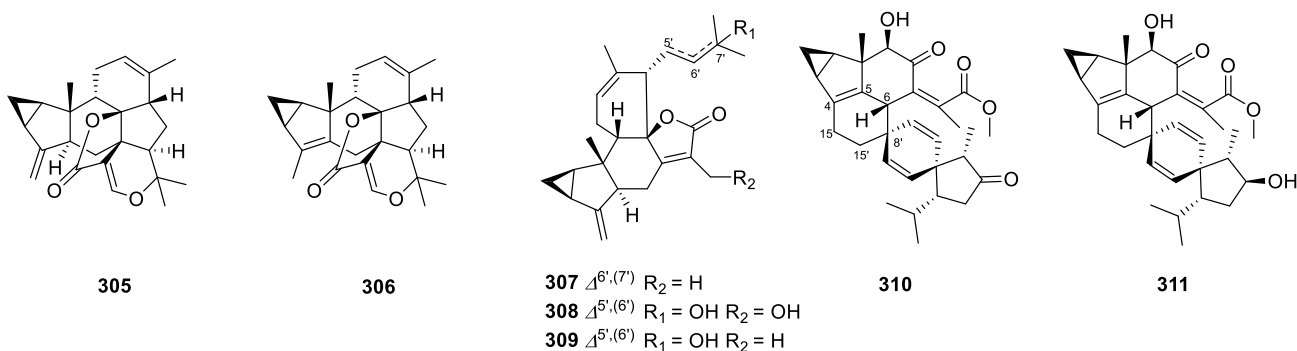

**Table S6** Structure names, sources and bioactivity of *hetero*-[4 + 2] cycloaddition type LS dimers (**305-311**).

| No         | Compound                | Sources                                | Bioactivity                            |
|------------|-------------------------|----------------------------------------|----------------------------------------|
| <b>305</b> | Bolivianine             | <i>H. angustifolium</i> <sup>107</sup> |                                        |
| <b>306</b> | Isobolivianine          | <i>H. angustifolium</i> <sup>107</sup> |                                        |
| <b>307</b> | Sarcaglabrin A          | <i>S. glabra</i> <sup>73</sup>         |                                        |
| <b>308</b> | Dyosmunoid A            | <i>H. orientale</i> <sup>108</sup>     |                                        |
| <b>309</b> | 7'-oxyisosarcaglabrin A | <i>S. glabra</i> <sup>109</sup>        |                                        |
| <b>310</b> | Chlorfortunone A        | <i>C. fortunei</i> <sup>110</sup>      | TGF- $\beta$ Inhibitory <sup>110</sup> |
| <b>311</b> | Chlorfortunone B        | <i>C. fortunei</i> <sup>110</sup>      |                                        |



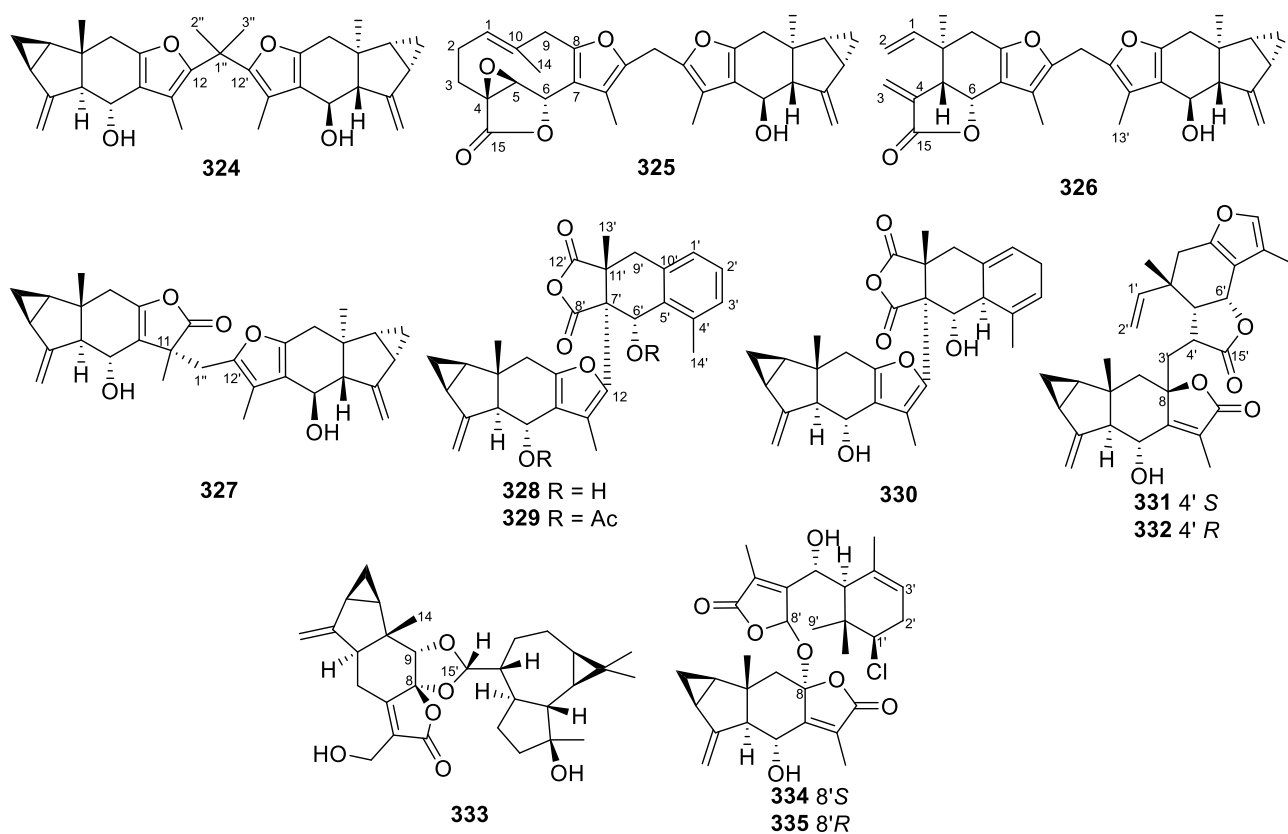

**Table S8** Structure names, sources and bioactivity of *hetero-linear linkage type LS dimers (324-335)*.

| No  | Compound            | Sources                            | Bioactivity                            |
|-----|---------------------|------------------------------------|----------------------------------------|
| 324 | Aggreganoid C       | <i>L. aggregata</i> <sup>114</sup> |                                        |
| 325 | Aggreganoid D       | <i>L. aggregata</i> <sup>114</sup> |                                        |
| 326 | Aggreganoid E       | <i>L. aggregata</i> <sup>114</sup> |                                        |
| 327 | Aggreganoid F       | <i>L. aggregata</i> <sup>114</sup> |                                        |
| 328 | Linderanoid A       | <i>L. aggregata</i> <sup>103</sup> |                                        |
| 329 | Linderanoid B       | <i>L. aggregata</i> <sup>103</sup> |                                        |
| 330 | Linderanoid C       | <i>L. aggregata</i> <sup>103</sup> |                                        |
| 331 | Linderanoid F       | <i>L. aggregata</i> <sup>103</sup> | TGF- $\beta$ Inhibitory <sup>103</sup> |
| 332 | Linderanoid G       | <i>L. aggregata</i> <sup>103</sup> |                                        |
| 333 | Hedyorienoid A      | <i>H. orientale</i> <sup>115</sup> |                                        |
| 334 | Linderaggrenolide H | <i>L. aggregata</i> <sup>106</sup> |                                        |
| 335 | Linderaggrenolide I | <i>L. aggregata</i> <sup>106</sup> |                                        |

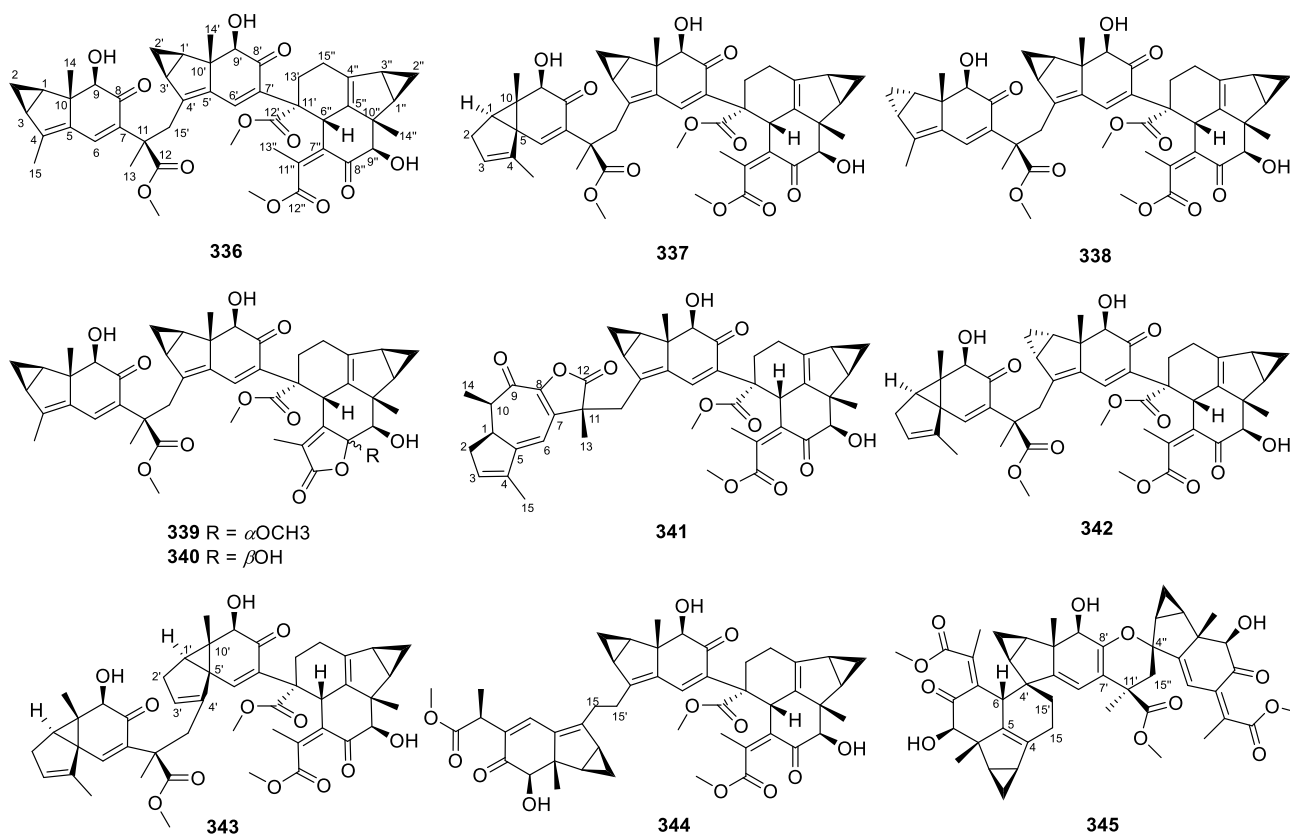

**Table S9** Structure names, sources and bioactivity of *homo*-[4 + 2] cycloaddition type LS trimers (336-345).

| No  | Compound        | Sources                                                                                                       | Bioactivity                                                     |
|-----|-----------------|---------------------------------------------------------------------------------------------------------------|-----------------------------------------------------------------|
| 336 | Trishizukaol A  | <i>C. japonicus</i> , <sup>102</sup> <i>C. spicatus</i> , <sup>116</sup><br><i>C. fortunei</i> <sup>117</sup> | Antimalarial <sup>116</sup>                                     |
| 337 | Trichloranoid A | <i>C. spicatus</i> <sup>116</sup>                                                                             | Antimalarial <sup>116</sup><br>Anti-Inflammatory <sup>117</sup> |
| 338 | Trichloranoid B | <i>C. spicatus</i> <sup>116</sup>                                                                             | Anti-Inflammatory <sup>117</sup>                                |
| 339 | Trichloranoid C | <i>C. spicatus</i> <sup>116</sup>                                                                             |                                                                 |
| 340 | Trichloranoid D | <i>C. spicatus</i> <sup>116</sup>                                                                             | Antimalarial <sup>116</sup>                                     |
| 341 | Chlofortunin B  | <i>C. fortunei</i> <sup>117</sup>                                                                             | Anti-Inflammatory <sup>117</sup>                                |
| 342 | Chlofortunin C  | <i>C. fortunei</i> <sup>117</sup>                                                                             | Anti-Inflammatory <sup>117</sup>                                |
| 343 | Chlofortunin D  | <i>C. fortunei</i> <sup>117</sup>                                                                             | Anti-Inflammatory <sup>117</sup>                                |
| 344 | Chlofortunin A  | <i>C. fortunei</i> <sup>117</sup>                                                                             |                                                                 |
| 345 | Spirolindemer B | <i>C. henryi</i> <sup>98</sup>                                                                                |                                                                 |

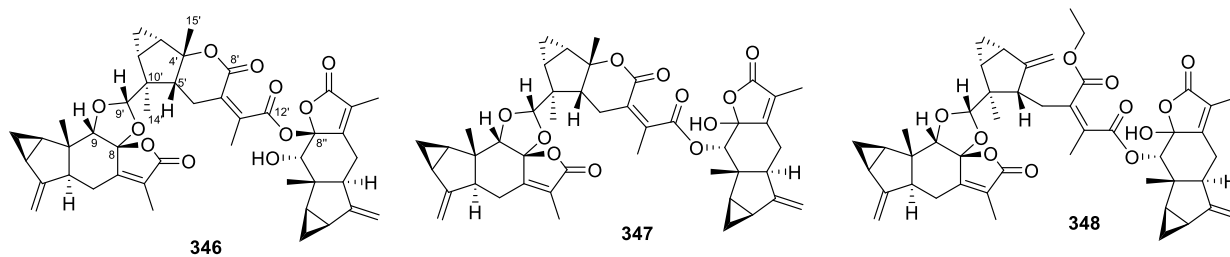

**Table S10** Structure names, sources and bioactivity of *homo*-linear linkage type LS trimers (346-348).

| No  | Compound      | Sources                        | Bioactivity                |
|-----|---------------|--------------------------------|----------------------------|
| 346 | Sarglactone A | <i>S. glabra</i> <sup>58</sup> | Cytotoxicity <sup>58</sup> |
| 347 | Sarglactone B | <i>S. glabra</i> <sup>58</sup> | Cytotoxicity <sup>58</sup> |
| 348 | Sarglactone C | <i>S. glabra</i> <sup>58</sup> | Cytotoxicity <sup>58</sup> |

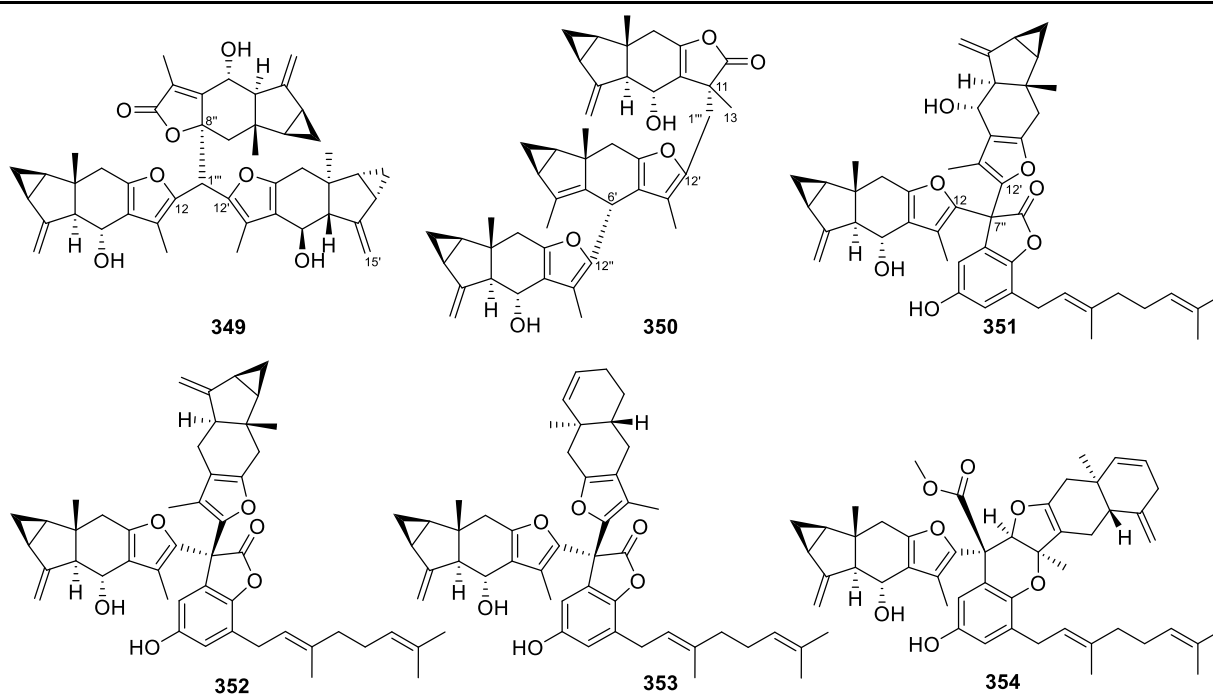

**Table S11** Structure names, sources and bioactivity of *hetero*-LS trimers (349-354).

| No  | Compound      | Sources                            | Bioactivity                            |
|-----|---------------|------------------------------------|----------------------------------------|
| 349 | Aggreganoid A | <i>L. aggregata</i> <sup>114</sup> | TGF- $\beta$ Inhibitory <sup>114</sup> |
| 350 | Aggreganoid B | <i>L. aggregata</i> <sup>114</sup> |                                        |
| 351 | Linalide A    | <i>L. aggregata</i> <sup>118</sup> |                                        |
| 352 | Linalide B    | <i>L. aggregata</i> <sup>118</sup> |                                        |
| 353 | Linalide C    | <i>L. aggregata</i> <sup>118</sup> |                                        |
| 354 | Linalide D    | <i>L. aggregata</i> <sup>118</sup> | Anti-Inflammatory <sup>118</sup>       |

## Reference

1. H. Kondo and T. Sanada, *Yakugaku Zasshi*, 1925, **526**, 1047–1057.
2. K. Takeda, M. Ikuta and M. Miyawaki, *Tetrahedron*, 1964, **20**, 2991–2997.
3. J. B. Li, Y. Ding and W. M. Li, *Chin. Chem. Lett.*, 2002, **13**, 965–967.
4. Q. Liu, J. H. Ahn, S. B. Kim, C. Lee, B. Y. Hwang and M. K. Lee, *Phytochemistry*, 2013, **87**, 112–118.
5. C. F. Zhang, N. Nakamura, S. Tewtrakul, M. Hattori, Q. S. Sun, Z. T. Wang and T. Fujiwara, *Chem. Pharm. Bull.*, 2002, **50**, 1195–1200.
6. S. S. Wen, Y. Wang, J. P. Xu, Q. Liu, L. Zhang, J. Zheng, L. Li, N. Zhang, X. Liu, Y. W. Xu and Z. L. Sun, *Nat. Prod. Res.*, 2022, **36**, 5407–5415.
7. H. J. Yang, E. B. Kwon and W. Li, *Nat. Prod. Res.*, 2022, **36**, 1914–1918.
8. H. Ishii, T. Tozyo, M. Nakamura and K. Takeda, *Tetrahedron*, 1968, **24**, 625–631.
9. K. Takeda, H. Ishii, T. Tozyo and H. Minato, *J. Chem. Soc. C*, 1969, 1920–1921.
10. Y. Cao, B. F. Xuan, B. Peng, C. Li, X. Y. Chai and P. F. Tu, *Phytochem. Rev.*, 2015, **15**, 869–906.
11. K. Takeda, H. Minato, I. Horibe and M. Miyawaki, *J. Chem. Soc., Perkin Trans. 1*, 1967, **7**, 631–634.
12. I. Kouno, A. Hirai, A. Fukushima, Z. H. Jiang and T. Tanaka, *J. Nat. Prod.*, 2001, **64**, 286–288.
13. Q. Liu, Y. H. Jo, S. B. Kim, Q. Jin, B. Y. Hwang and M. K. Lee, *Bioorg. Med. Chem. Lett.*, 2016, **26**, 4950–4954.
14. M. Zhang, J. S. Wang, P. R. Wang, M. Oyama, J. Luo, T. Ito, M. Iinuma and L. Y. Kong, *Fitoterapia*, 2012, **83**, 1604–1609.
15. X. H. Li, H. Y. Li, W. Ni, X. J. Qin, Q. Zhao, Z. Q. Ji and H. Y. Liu, *Phytochem. Lett.*, 2016, **15**, 199–203.
16. Q. H. Cao, W. F. Dai, B. C. Li and M. Zhang, *Phytochem. Lett.*, 2019, **30**, 6–9.
17. J. Kawabata, S. Tahara, J. Mizutani, A. Furusaki, N. Hashiba and T. Matsumoto, *Agric. Biol. Chem.*, 1979, **43**, 885–887.
18. H. Yan, X. H. Li, X. F. Zheng, C. L. Sun and H. Y. Liu, *Helv. Chim. Acta.*, 2013, **96**, 1386–1391.
19. L. F. Maia, R. d. A. Epifanio, T. Eve and W. Fenical, *J. Nat. Prod.*, 1999, **62**, 1322–1324.
20. J. E. Heo, G. L. Jin, Y. Y. Lee and H. S. Y. Choi, *Nat. Prod. Sci.*, 2005, **11**, 41–44.
21. X. R. Hu, J. S. Yang and X. D. Xu, *Chem. Pharm. Bull.*, 2009, **57**, 418–420.
22. Q. H. Wang, H. X. Kuang, B. Y. Yang, Y. G. Xia, J. S. Wang and L. Y. Kong, *J. Nat. Prod.*, 2011, **74**, 16–20.
23. Y. Li, D. M. Zhang, J. B. Li, S. S. Yu, Y. Li and Y. M. Luo, *J. Nat. Prod.*, 2006, **69**, 616–620.
24. C. S. Jiang, Y. Q. Guo, S. Yin, H. Zhang and G. H. Tang, *J. Asian. Nat. Prod. Res.*, 2019, **21**, 377–383.
25. M. Uchida, Y. Koike, G. Kusano, Y. Kondo, S. Nozoe, C. Kabuto and T. Takemoto, *Chem. Pharm. Bull.*, 1980, **28**, 92–102.
26. Y. Takeda, H. Yamashita, T. Matsumoto and H. Terao, *Phytochemistry*, 1993, **33**, 713–715.
27. L. P. Zhu, Y. Li, J. Z. Yang, L. Zuo and D. M. Zhang, *J. Asian. Nat. Prod. Res.*, 2008, **10**, 541–545.
28. X. F. He, S. Yin, Y. C. Ji, Z. S. Su, M. Y. Geng and J. M. Yue, *J. Nat. Prod.*, 2010, **73**, 45–50.
29. G. Ni, H. Zhang, H. C. Liu, S. P. Yang, M. Y. Geng and J. M. Yue, *Tetrahedron*, 2013, **69**, 564–569.
30. S. Y. Kao, J. H. Su, T. L. Hwang, J. H. Sheu, Z. H. Wen, Y. C. Wu and P. J. Sung, *Mar. Drugs*, 2011, **9**, 1534–1542.
31. M. Bittner, J. Jakupovic, F. Bohlmann and M. Silva, *Phytochemistry*, 1989, **28**, 271–273.
32. G. X. Chou, N. Norio, C. M. Ma, Z. T. Wang, H. Masao, L. S. Xu and G. J. Xu, *Zhongguo Yaoke Daxue Xuebao*, 2000, **31**, 339.
33. J. H. Kim, J. S. Jeon, J. H. Kim, E. J. Jung, Y. J. Lee, E. M. Gao, A. S. Syed, R. H. Son and C. Y. Kim, *Molecules*, 2021, **26**, 5269.
34. L. R. Fernandez, E. Butassi, L. Svetaz, S. A. Zacchino, J. A. Palermo and M. Sanchez, *J. Nat. Prod.*, 2014, **77**, 1579–1585.

35. F. Bohlmann, G. W. Ludwig, J. Jakupovic, R. M. King and H. Robinson, *Chemischer Informationsdienst*, 1984, **15**, 304.
36. Y. S. Shi, Y. B. Liu, S. G. Ma, Y. Li, J. Qu, L. Li, S. P. Yuan, Q. Hou, Y. H. Li, J. D. Jiang and S. S. Yu, *J. Nat. Prod.*, 2015, **78**, 1526–1535.
37. B. Zhou, Y. Wu, S. Dalal, E. F. Merino, Q. F. Liu, C. H. Xu, T. Yuan, J. Ding, D. G. Kingston, M. B. Cassera and J. M. Yue, *J. Nat. Prod.*, 2017, **80**, 96–107.
38. T. O. Do, T. K. Pham, T. B. H. Nguyen, H. Y. Pham, H. H. Tran, X. C. Nguyen, V. L. Dang, V. M. Chau and V. K. Phan, *Nat. Prod. Commun.*, 2010, **5**, 1717–1720.
39. B. Zhou, Q. F. Liu, S. Dalal, M. B. Cassera and J. M. Yue, *Org. Lett.*, 2017, **19**, 734–737.
40. L. J. Wang, J. Xiong, C. Lau, L. L. Pan and J. F. Hu, *J. Asian. Nat. Prod. Res.*, 2015, **17**, 1220–1230.
41. H. X. Kuang, Y. G. Xia, B. Y. Yang, Q. H. Wang and S. W. Lu, *Chem. Biodivers.*, 2008, **5**, 1736–1742.
42. T. H. Duong, M. A. Beniddir, N. T. Trung, C. D. Phan, V. G. Vo, V. K. Nguyen, Q. L. Le, H. D. Nguyen and P. L. Pogam, *Molecules*, 2020, **25**, 1830.
43. W. Y. Tsui, *Phytochemistry*, 1996, **43**, 819–821.
44. M. Uchida, G. Kusano, Y. Kondo and S. Nozoe, *Heterocycles*, 1978, **9**, 139–144.
45. B. Wu, J. Chen, H. B. Qu and Y. Y. Cheng, *J. Nat. Prod.*, 2008, **71**, 877–880.
46. L. Acebey, V. Jullian, D. Sereno, S. Chevalley, Y. Estevez, C. Moulis, S. Beck, A. Valentin, A. Gimenez and M. Sauvain, *Planta Med.*, 2010, **76**, 365–368.
47. J. Kawabata and J. Mizutani, *Agric. Biol. Chem.*, 1989, **53**, 203–207.
48. S. Tahara, Y. Fukushi, J. Kawabata and J. Mizutani, *Agric. Biol. Chem.*, 2014, **45**, 1511–1512.
49. X. C. Wang, L. L. Wang, X. W. Ouyang, S. P. Ma, J. H. Liu and L. H. Hu, *Helv. Chim. Acta.*, 2009, **92**, 313–320.
50. H. Okamura, N. Nakashima, T. Iwagawa, N. Nakayama and M. Nakatani, *Chem. Lett.*, 1994, 1541–1542.
51. P. C. Kuo, Y. H. Wu, H. Y. Hung, S. H. Lam, G. H. Ma, L. M. Kuo, T. L. Hwang, D. H. Kuo and T. S. Wu, *Bioorg. Med. Chem. Lett.*, 2020, **30**, 127224.
52. M. Zhang, J. S. Wang, M. Oyama, J. Luo, C. Guo, T. Ito, M. Inuma and L. Y. Kong, *J. Asian. Nat. Prod. Res.*, 2012, **14**, 708–712.
53. S. Yaermainaiti, P. Wang, J. Luo, R. J. Li and L. Y. Kong, *Fitoterapia*, 2016, **111**, 7–11.
54. S. Y. Kao, J. H. Su, T. L. Hwang, J. H. Sheu, Y. D. Su, C. S. Lin, Y. C. Chang, W. H. Wang, L. S. Fang and P. J. Sung, *Tetrahedron*, 2011, **67**, 7311–7315.
55. L. S. Gan, Y. L. Zheng, J. X. Mo, X. Liu, X. H. Li and C. X. Zhou, *J. Nat. Prod.*, 2009, **72**, 1497–1501.
56. J. L. Yang and Y. P. Shi, *Planta. Med.*, 2012, **78**, 59–64.
57. T. T. Huong, N. V. Thong, T. T. Minh, L. H. Tram, N. T. Anh, H. D. Cuong, P. V. Cuong and D. V. Ca, *Lett. Org. Chem.*, 2014, **11**, 639–642.
58. J. Chi, S. S. Wei, H. L. Gao, D. Xu, L. Zhang, L. Yang, W. J. Xu, J. Luo and L. Y. Kong, *J. Org. Chem.*, 2019, **84**, 9117–9126.
59. Y. Q. Guo, J. J. Zhao, Z. Z. Li, G. H. Tang, Z. M. Zhao and S. Yin, *Bioorg. Med. Chem. Lett.*, 2016, **26**, 3163–3166.
60. P. L. Fang, Y. L. Cao, H. Yan, L. L. Pan, S. C. Liu, N. B. Gong, Y. Lu, C. X. Chen, H. M. Zhong, Y. Guo and H. Y. Liu, *J. Nat. Prod.*, 2011, **74**, 1408–1413.
61. J. Kawabata, Y. Fukushi, S. Tahara and J. Mizutani, *Phytochemistry*, 1990, **29**, 2332–2334.
62. J. Kawabata and J. Mizutani, *Phytochemistry*, 1992, **31**, 1293–1296.
63. X. C. Wang, Y. N. Zhang, L. L. Wang, S. P. Ma, J. H. Liu and L. H. Hu, *J. Nat. Prod.*, 2008, **71**, 674–677.
64. G. Kusano, M. Abe, Y. Koike, M. Uchida, S. Nozoe and Z. Taira, *Yakugaku Zasshi*, 1991, **111**, 756–764.
65. C. P. Shen, J. G. Luo, M. H. Yang and L. Y. Kong, *Phytochemistry*, 2017, **137**, 117–122.



66. P. Wang, J. Luo, Y. M. Zhang and L. Y. Kong, *Tetrahedron*, 2015, **71**, 5362–5370.
67. J. Kawabata, E. Fukushi and J. Mizutani, *Phytochemistry*, 1995, **39**, 121–125.
68. S. P. Yang, Z. B. Gao, Y. Wu, G. Y. Hu and J. M. Yue, *Tetrahedron*, 2008, **64**, 2027–2034.
69. C. J. Li, D. M. Zhang, Y. M. Luo, S. S. Yu, Y. Li and Y. Lu, *Phytochemistry*, 2008, **69**, 2867–2874.
70. S. Y. Kim, Y. Kashiwada, K. Kawazoe, K. Murakami, H. D. Sun, S. L. Li and Y. Takaishi, *Chem. Pharm. Bull.*, 2011, **59**, 1281–1284.
71. B. Bai, S. X. Ye, D. P. Yang, L. P. Zhu, G. H. Tang, Y. Y. Chen, G. Q. Li and Z. M. Zhao, *J. Nat. Prod.*, 2019, **82**, 407–411.
72. S. Zhang, S. P. Yang, T. Yuan, B. D. Lin, Y. Wu and J. M. Yue, *Tetrahedron Lett.*, 2010, **51**, 764–766.
73. X. R. Yang, N. Tanaka, D. Tsuji, F. L. Lu, X. J. Yan, K. Itoh, D. P. Li and Y. Kashiwada, *Tetrahedron Lett.*, 2020, **61**, 151916.
74. W. M. Huang, Y. T. Bian, F. Y. Chen, T. J. Ning, Z. Y. Zhu, Z. C. Chen and Y. M. Luo, *Phytochemistry*, 2022, **193**, 113001.
75. X. H. Ran, F. Teng, C. X. Chen, G. Wei, X. J. Hao and H. Y. Liu, *J. Nat. Prod.*, 2010, **73**, 972–975.
76. Z. G. Zhuo, G. Z. Wu, X. Fang, X. H. Tian, H. Y. Dong, X. K. Xu, H. L. Li, N. Xie, W. D. Zhang and Y. H. Shen, *Fitoterapia*, 2017, **119**, 90–99.
77. S. Y. Wang, Y. Q. Li, X. L. Wang, X. Q. Zhang, F. Xu, P. Ying, L. Y. Kong and J. Luo, *Fitoterapia*, 2023, **168**, 105547.
78. D. Y. Zhang, Y. R. Hu, H. J. Yang, Y. N. Wang, S. Liu, Y. H. Zou, J. J. Zhou, P. Y. Zhuang, X. X. Wang and H. Liu, *Chin. J. Chem.*, 2023, **41**, 1209–1225.
79. L. G. Xiao, P. Li, H. Yan, W. Ni, L. He and H. Y. Liu, *Org. Biomol. Chem.*, 2022, **20**, 1320–1326.
80. M. Zhang, M. Iinuma, J. S. Wang, M. Oyama, T. Ito and L. Y. Kong, *J. Nat. Prod.*, 2012, **75**, 694–698.
81. X. W. Shi, Q. Q. Lu, G. Pescitelli, T. Ivsic, J. H. Zhou and J. M. Gao, *Chirality*, 2016, **28**, 158–163.
82. B. Wu, H. B. Qu and Y. Y. Cheng, *Helv. Chim. Acta.*, 2008, **91**, 725–733.
83. H. Yan, M. Y. Ba, X. H. Li, J. M. Guo, X. J. Qin, L. He, Z. Q. Zhang, Y. Guo and H. Y. Liu, *Fitoterapia*, 2016, **115**, 64–68.
84. X. F. He, S. Zhang, R. X. Zhu, S. P. Yang, T. Yuan and J. M. Yue, *Tetrahedron*, 2011, **67**, 3170–3174.
85. D. Y. Zhang, X. X. Wang, Y. N. Wang, M. Wang, P. Y. Zhuang, Y. Jin and H. Liu, *Org. Chem. Front.*, 2021, **8**, 4374–4386.
86. Y. P. Sun, J. Chi, L. Zhang, S. Y. Wang, Z. H. Chen, H. Zhang, L. Y. Kong and J. Luo, *J. Org. Chem.*, 2022, **87**, 4323–4332.
87. B. Zhou, F. M. Zimbres, J. H. Butler, C. H. Xu, R. S. Haney, Y. Wu, M. B. Cassera and J. M. Yue, *Sci. China: Chem.*, 2021, **65**, 82–86.
88. Y. Q. Guo, G. H. Tang, Z. Z. Li, S. L. Lin and S. Yin, *RSC Adv.*, 2015, **5**, 103047–103051.
89. Y. Y. Wang, Z. H. Chen, Q. R. Li, L. T. Cui, J. Chi, J. X. Li, Y. P. Sun, L. Y. Kong and J. Luo, *Tetrahedron Lett.*, 2022, **98**, 153834.
90. S. P. Yang, Z. B. Gao, F. D. Wang, S. G. Liao, H. D. Chen, C. R. Zhang, G. Y. Hu and J. M. Yue, *Org. Lett.*, 2007, **9**, 903–906.
91. S. Y. Kim, Y. Kashiwada, K. Kawazoe, K. Murakami, H. D. Sun, S. L. Li and Y. Takaishi, *Tetrahedron Lett.*, 2009, **50**, 6032–6035.
92. S. P. Yang and J. M. Yue, *Tetrahedron Lett.*, 2006, **47**, 1129–1132.
93. S. Y. Kim, Y. Kashiwada, K. Kawazoe, K. Murakami, H. D. Sun, S. L. Li and Y. Takaishi, *Phytochem. Lett.*, 2009, **2**, 110–113.
94. Z. G. Zhuo, Z. Y. Cheng, J. Ye, H. L. Li, X. K. Xu, N. Xie, W. D. Zhang and Y. H. Shen, *Phytochem. Lett.*, 2017, **20**, 133–138.

95. Y. J. Xu, C. P. Tang, C. Q. Ke, J. B. Zhang, H. C. Weiss, E. R. Gesing and Y. Ye, *J. Nat. Prod.*, 2007, **70**, 1987–1990.
96. Y. Y. Fan, L. S. Gan, S. X. Chen, Q. Gong, H. Y. Zhang and J. M. Yue, *J. Org. Chem.*, 2021, **86**, 11277–11283.
97. J. Chi, W. J. Xu, S. S. Wei, X. B. Wang, J. X. Li, H. L. Gao, L. Y. Kong and J. Luo, *Org. Lett.*, 2019, **21**, 789–792.
98. J. X. Li, J. Chi, P. F. Tang, Y. P. Sun, W. J. Lu, W. J. Xu, Y. Y. Wang, J. Luo and L. Y. Kong, *Chin. J. Chem.*, 2022, **40**, 603–608.
99. J. Kawabata, E. Fukushi and J. Mizutani, *Phytochemistry*, 1993, **32**, 1347–1349.
100. H. Yan, X. J. Qin, X. H. Li, Q. Yu, W. Ni, L. He and H. Y. Liu, *Tetrahedron Lett.*, 2019, **60**, 713–717.
101. J. X. Li, Z. R. Cui, Y. Y. Li, C. H. Han, Y. Q. Zhang, P. F. Tang, L. T. Cui, H. Zhang, J. Luo and L. Y. Kong, *Chin. Chem. Lett.*, 2022, **33**, 4257–4260.
102. J. Kawabata, E. Fukushi and J. Mizutani, *Phytochemistry*, 1998, **47**, 231–235.
103. X. Liu, J. Fu, R. S. Shen, X. J. Wu, J. Yang, L. P. Bai, Z. H. Jiang and G. Y. Zhu, *Phytochemistry*, 2021, **191**, 112924.
104. Y. X. Li, S. S. Wen, H. Yang, Y. Wang, Y. Wu and Z. L. Sun, *Chem. Nat. Compd.*, 2019, **55**, 1069–1072.
105. Q. Y. Li, Y. Wang, S. S. Wen, Y. Wu, L. H. Xu and Z. L. Sun, *Rec. Nat. Prod.*, 2019, **13**, 483–490.
106. X. Liu, J. Fu, J. Yang, A. C. Huang, R. F. Li, L. P. Bai, L. Liu, Z. H. Jiang and G. Y. Zhu, *ACS. Omega.*, 2021, **6**, 5898–5909.
107. L. Acebey, M. Sauvain, S. Beck, C. Moulis, A. Gimenez and V. Jullian, *Org. Lett.*, 2007, **9**, 4693–4696.
108. Y. Y. Fan, C. Y. Zheng, B. Zhou, F. M. Zimbres, M. B. Cassera and J. M. Yue, *Chin. J. Chem.*, 2022, **41**, 392–398.
109. Y. P. Sun, Y. Y. Wang, Y. Y. Li, S. Y. Wang, D. Y. Zhang, L. Y. Kong and J. Luo, *Org. Biomol. Chem.*, 2022, **20**, 9222–9227.
110. X. J. Wu, D. Cao, F. L. Chen, R. S. Shen, J. Gao, L. P. Bai, W. Zhang, Z. H. Jiang and G. Y. Zhu, *ACS. Omega.*, 2022, **7**, 35063–35068.
111. P. Wang, R. J. Li, R. H. Liu, K. L. Jian, M. H. Yang, L. Yang, L. Y. Kong and J. Luo, *Org. Lett.*, 2016, **18**, 832–835.
112. Y. Y. Wang, Z. R. Cui, J. Chi, P. F. Tang, M. H. Zhang, J. X. Li, Y. Y. Li, H. Zhang, J. Luo and L. Y. Kong, *Chin. J. Chem.*, 2020, **39**, 129–136.
113. Z. R. Cui, Y. Y. Wang, J. X. Li, J. Chi, P. P. Zhang, L. Y. Kong and J. Luo, *Org. Lett.*, 2022, **24**, 9107–9111.
114. X. Liu, J. Yang, J. Fu, X. J. Yao, J. R. Wang, L. Liu, Z. H. Jiang and G. Y. Zhu, *Org. Lett.*, 2019, **21**, 5753–5756.
115. Y. Y. Fan, Y. L. Sun, B. Zhou, J. X. Zhao, L. Sheng, J. Y. Li and J. M. Yue, *Org. Lett.*, 2018, **20**, 5435–5438.
116. J. S. Zhou, Q. F. Liu, F. M. Zimbres, J. H. Butler, M. B. Cassera, B. Zhou and J. M. Yue, *Org. Chem. Front.*, 2021, **8**, 1795–1801.
117. S. Y. Wang, Y. P. Sun, Y. Q. Li, W. J. Xu, Q. Q. Li, Y. B. Mu, L. Y. Kong and J. Luo, *J. Org. Chem.*, 2023, **88**, 347–354.
118. X. Liu, J. Yang, X. J. Yao, X. Yang, J. Fu, L. P. Bai, L. Liu, Z. H. Jiang and G. Y. Zhu, *J. Org. Chem.*, 2019, **84**, 8242–8247.
